# Supplementary material for: Iodide ion receptors: shape-persistent macrocycles of syn/anti configurations
Source: Royal Society of Chemistry journal article supplement (doi:10.1039/d1nj00247c), 2021-01-01
Supplement: d1nj00247c1.pdf [file d1nj00247c1.pdf]

## Supplementary Materials

### Iodide ion receptors: shape-persistent macrocycles of *syn/anti* configurations

Guang-Wei Zhang,<sup>a</sup> Jia-Yin Xiang,<sup>a</sup> Tao-Tao Zhong,<sup>a</sup> Xin-Ru Zhi,<sup>a</sup> Chuang Gao,<sup>a</sup> Wei Huang,<sup>a</sup> Shuai Yuan,<sup>a</sup> Ling-Hai Xie<sup>a</sup> and Wei Huang<sup>abc\*</sup>

<sup>a</sup> Centre for Molecular Systems and Organic Devices (CMSOD), Key Laboratory for Organic Electronics and Information Displays and Jiangsu Key Laboratory for Biosensors, Institute of Advanced Materials (IAM), Nanjing University of Posts and Telecommunications, 9 Wenyuan Road, Nanjing, 210023, China; <sup>b</sup>Frontiers Science Centre for Flexible Electronics (FSCFE), MIIT Key Laboratory of Flexible Electronics (KLOFE), Shaanxi Key Laboratory of Flexible Electronics, Xi'an Key Laboratory of Flexible Electronics, Xi'an Key Laboratory of Biomedical Materials & Engineering, Xi'an Institute of Flexible Electronics, Institute of Flexible Electronics (IFE), Northwestern Polytechnical University, Xi'an 710072, Shaanxi, China; <sup>c</sup>Key Laboratory of Flexible Electronics (KLOFE) & Institute of Advanced Materials (IAM), Nanjing Tech University (NanjingTech), 30 South Puzhu Road, Nanjing 211816, China

## Table of Contents

|                                                                                                               |    |
|---------------------------------------------------------------------------------------------------------------|----|
| 1. General information of synthesis.....                                                                      | 3  |
| 2. General experimental and synthetic details to the <i>syn/anti</i> isomers .....                            | 3  |
| 3. MALDI-TOF-MS of <i>syn/anti</i> isomers.....                                                               | 13 |
| 4. <sup>1</sup> H NMR of the <i>syn/anti</i> isomers .....                                                    | 14 |
| 5. Optimized geometries of the two isomers of the 1:1 complex by Gaussian computer program .....              | 15 |
| 6. UV-visible absorption of <i>syn/anti</i> isomers in CH <sub>2</sub> Cl <sub>2</sub> solution .....         | 16 |
| 7. Binding constants determined by UV-vis itrations.....                                                      | 19 |
| 8. Fluorescence emission spectra of <i>syn/anti</i> isomers in CH <sub>2</sub> Cl <sub>2</sub> solution ..... | 22 |
| 9. Fluorescence spectral changes of <i>syn/anti</i> isomers in CH <sub>2</sub> Cl <sub>2</sub> .....          | 25 |
| 10. Single crystal X-ray diffraction data for <i>syn</i> -isomer .....                                        | 26 |
| 11. Cartesian coordinates of the optimized compounds .....                                                    | 27 |
| 12. References .....                                                                                          | 41 |

## 1. General information of synthesis

**Chemicals:** Unless otherwise stated, all solvents and reagents were purchased from commercial suppliers and used without further purification. All products were separated by column chromatography. Spectrochemical grade solvents were used for optical measurement. Tetrakis(triphenylphosphine)palladium(II) and carbazole were purchased from Aldrich Chemical Co. Boron trifluoride etherate, potassium carbonate, potassium fluoride, and magnesium sulfate were purchased from Sinopharm Holding Chemical Reagent Co Ltd without further purification. Before use, the methylene chloride was dried with anhydrous sodium sulfate. Tetrahydrofuran and toluene were dried over sodium benzophenone anion and distilled under a dry nitrogen atmosphere. Tetrabutylammonium fluoride (TBAF), tetrabutylammonium chloride (TBACl), tetrabutylammonium bromide (TBABr) and tetrabutylammonium iodide (TBAI) were all from Anaiji without purification and used directly.

**Characterization:**  $^1\text{H-NMR}$  was recorded on a Bruker 400 MHz spectrometer in  $\text{d-CDCl}_3$  or  $\text{d-CD}_2\text{Cl}_2$  with tetramethylsilane (TMS) as the interval standard. For the MALDI-TOF MS spectra, the spectra were recorded in reflective mode, and substrates were used. The best structure of the compound was calculated by Gaussian computer program -Gaussian 09.<sup>[1]</sup> Absorption spectra were measured with a Shimadzu UV-3150 spectrometer at 25 °C, and emission spectra were recorded on a Shimadzu RF-530XPC luminescence spectrometer upon excitation at the absorption maxima.

## 2. General experimental and synthetic details to the *syn/anti* isomers

### 2.1 Compound 3: 1-bromo-4-(octyloxy) benzene

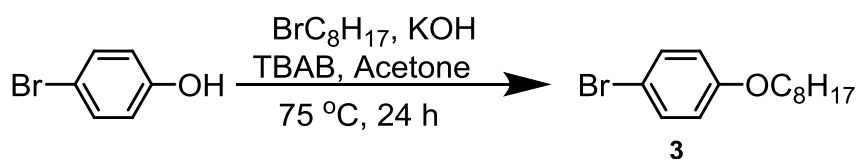

Under the protection of nitrogen, bromophenol (275 mmol, 47 g), bromooctane

(261 mmol, 50 g), potassium hydroxide (410 mmol, 23 g) and tetrabutylammonium bromide (4 g) were dissolved in 300 mL of acetone. The reaction was stirred overnight at 75°C. After cooling to room temperature, undissolved solid was filtered. The filtrate was concentrated under reduced pressure to obtain the crude product, which was purified by column chromatography to give pure 1-bromo-4-(octyloxy)benzene (68 g, 92%). <sup>1</sup>H NMR (400 MHz, CDCl<sub>3</sub>) δ 7.39 – 7.32 (m, 1H), 6.80 – 6.73 (m, 1H), 3.91 (t, J = 6.6 Hz, 1H), 1.77 (dt, J = 14.6, 6.6 Hz, 1H), 1.50 – 1.24 (m, 6H), 0.94 – 0.82 (m, 3H).

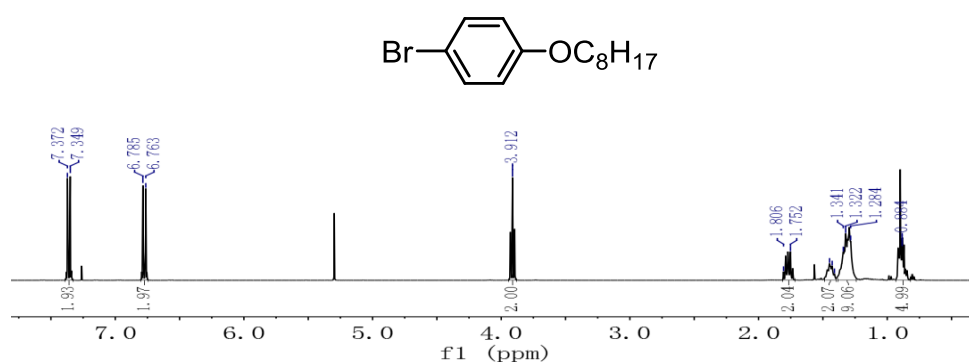

Figure S1. <sup>1</sup>H NMR spectrum of **3** recorded in CDCl<sub>3</sub>

## 2.2 Compound **4**: 3-(4, 4, 5, 5-tetramethyl-1, 3, 2-dioxaborolan) carbazole

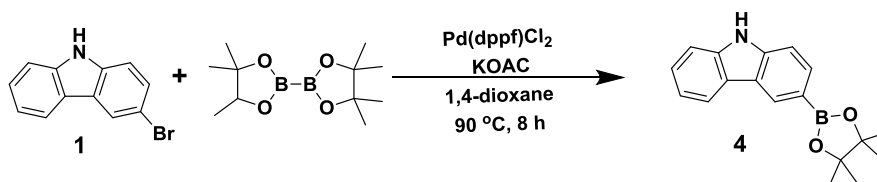

Under the protection of nitrogen, 3-bromocarbazole (60.95 mmol, 15 g), pinacol diborate (182.84 mmol, 43.68 g, 3 eq), potassium acetate (365.68 mmol, 35.89 g, 6 eq), palladium bistrisphenylphosphine dichloride (6.095 mmol, 4.278 g, 0.1 eq) were dissolved in 500 mL of 1,4-dioxane. And the reaction was refluxed at 90 °C for 8 hours. After cooling to room temperature, extracted with dichloromethane and water,

the filtrate was concentrated under reduced pressure to obtain the crude product, which was purified by column chromatography using petroleum ether-dichloromethane (2:1, v/v) as the eluent to give pure 3-(4,4,5,5-tetramethyl-1,3,2-dioxaborolan) carbazole (15.724 g, 88%).  $^1\text{H}$  NMR (400 MHz,  $\text{CDCl}_3$ )  $\delta$  8.59 (s, 1H), 8.19 (s, 1H), 8.11 (d,  $J = 7.8$  Hz, 1H), 7.88 (dd,  $J = 8.1, 1.1$  Hz, 1H), 7.44–7.38 (m, 3H), 7.26–7.22 (m, 1H), 1.40 (s, 12H).

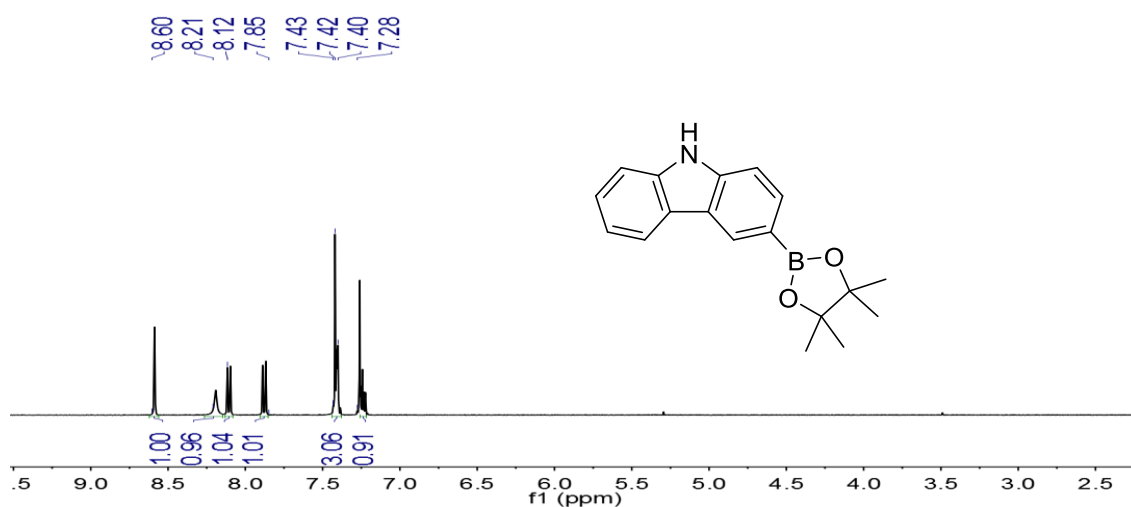

Figure S2.  $^1\text{H}$  NMR spectrum of **4** recorded in  $\text{CDCl}_3$

### 2.3 Compound **5**: 2-bromo-9-(4-octyl oxy phenyl) -9-fluorene -9-ol

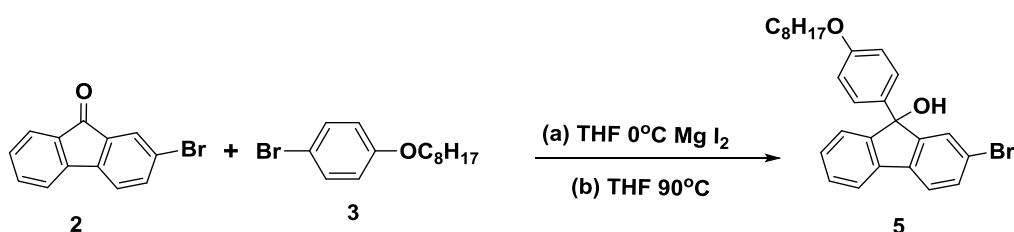

Magnesium turning (1.6 mmol, 1.6 g), one piece of  $\text{I}_2$ , 20 mL of tetrahydrofuran and p-bromo -n- octyloxybenzene were added into a dry Schlenk tube. Then 5.00 mL of dry THF was added to disperse the powder under a nitrogen atmosphere. Then it was initiated by a heating gun, the solution changed from turbid to clear, and the reaction was completed. Then the mixture was antiferred to an oil bath at  $55^\circ\text{C}$  for 3 hours until most magnesium fragments disappeared. Next, the above reaction solution

was antiferred to a reaction flask with 2-bromofluorenone (30 mmol, 7.76 g) and tetrahydrofuran (400 mL) and refluxed for 24 h. After the reaction was cooled to room temperature, the filtrate was concentrated under reduced pressure to obtain the crude product, which was purified by column chromatography using petroleum ether-dichloromethane (1:1, v/v) as the eluent to give pure 2-bromo-9-(4-octyl oxy phenyl)-9-fluorene-9-ol (65% yield).  $^1\text{H NMR}$  (400 MHz,  $\text{CDCl}_3$ )  $\delta$  7.63 (d,  $J = 7.6$  Hz, 1H), 7.54–7.50 (m, 1H), 7.49–7.45 (m, 2H), 7.37 (td,  $J = 7.3, 1.5$  Hz, 1H), 7.32 (d,  $J = 6.1$  Hz, 1H), 7.30–7.26 (m, 2H), 7.25 (d,  $J = 3.1$  Hz, 1H), 6.82–6.77 (m, 2H), 3.91 (t,  $J = 6.6$  Hz, 2H), 2.48 (s, 1H), 1.79–1.70 (m, 2H), 1.37–1.21 (m, 10H), 0.87 (d,  $J =$

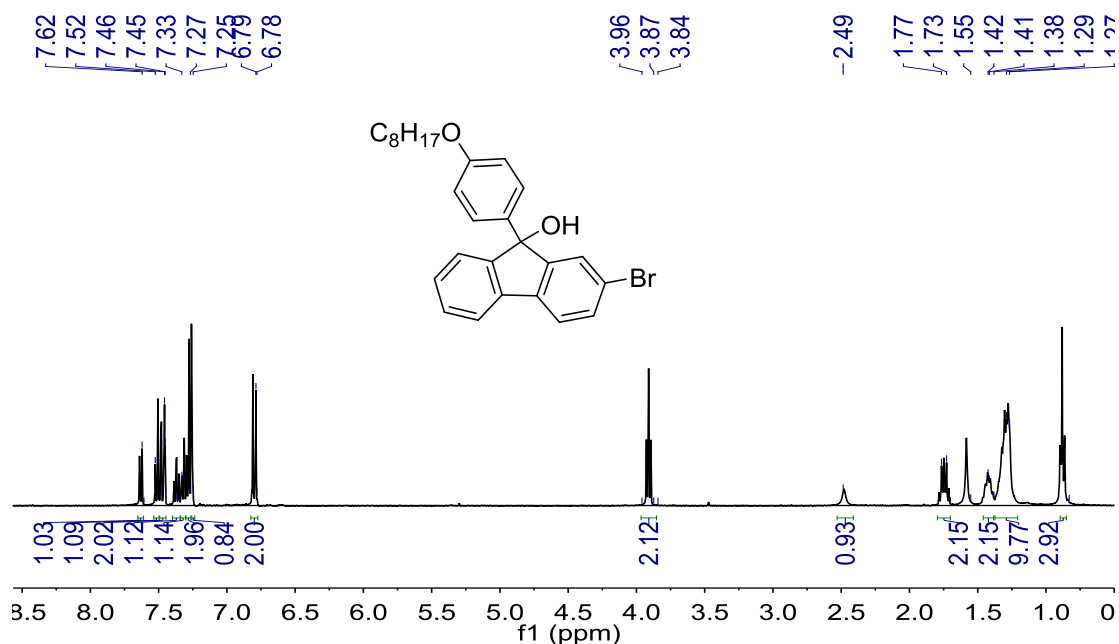

7.0 Hz, 3H).

Figure S3.  $^1\text{H NMR}$  spectrum of 5 recorded in  $\text{CDCl}_3$

#### 2.4 Compound 6: 2-(9H-carbazol-3-yl)-9H-fluoren-9-one

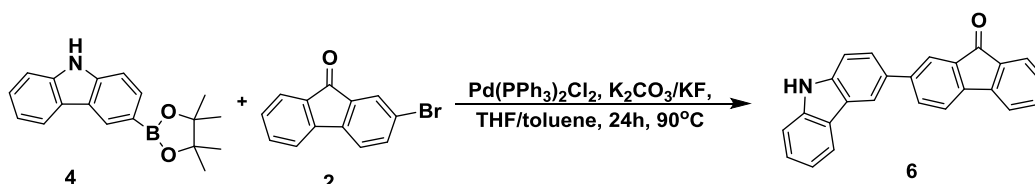

2-bromofluorenone (27.29 mmol, 7.07 g), 3-carbazolylboronic acid pinacol

ester (40.93 mmol, 12 g, 1.5 eq), tetrabistriphenylphosphoropalladium (0.82 mmol, 0.95 g, 0.03 eq) were dissolved in 50 mL of Tol/THF (1:1, v/v) under a nitrogen atmosphere. Then 20 mL of dry K<sub>2</sub>CO<sub>3</sub>/KF was poured into the reaction and refluxed at 90 °C for 24 h. After the reaction was completed, it was quenched with water. The filtrate was concentrated under reduced pressure to obtain the crude product, which was purified by column chromatography using petroleum ether-dichloromethane (3:1-2:1, v/v) as the eluent to give pure 2-(9H-carbazol-3-yl)-9H-fluoren-9-one (4.71 g, 50 %). <sup>1</sup>H NMR (400 MHz, CDCl<sub>3</sub>) δ 8.36 (s, 1H), 8.16 (d, J = 8.0 Hz, 2H), 8.06 (s, 1H), 7.86 (d, J = 8.0 Hz, 1H), 7.72 (d, J = 7.8 Hz, 2H), 7.63 (d, J = 7.4 Hz, 1H), 7.58 (d, J = 7.2 Hz, 1H), 7.56 - 7.51 (m, 2H), 7.49 (s, 2H), 7.32 (dd, J = 14.0, 6.4 Hz, 2H).

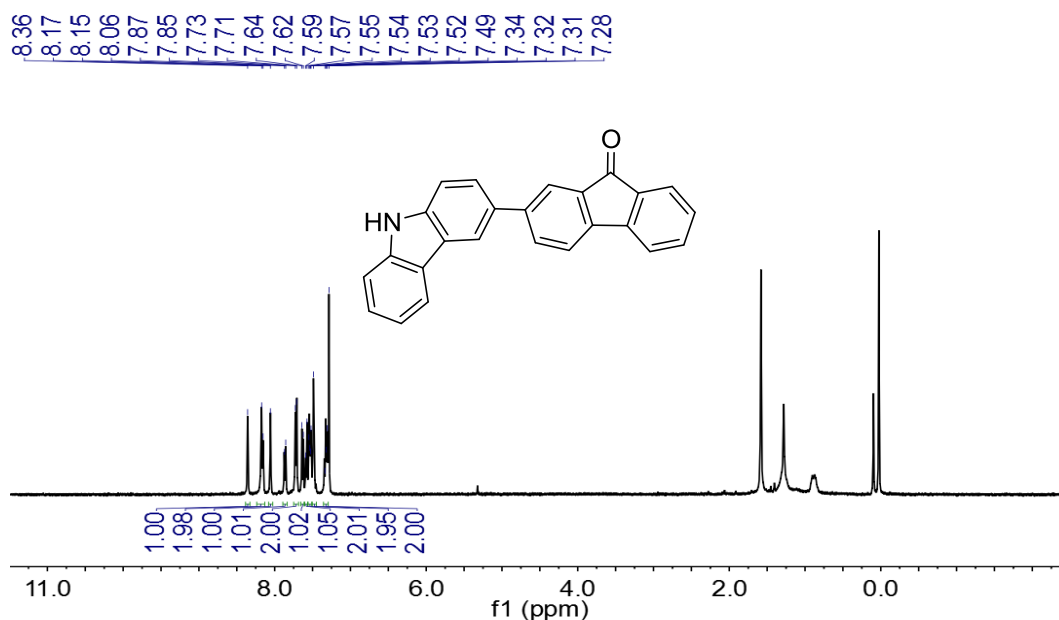

Figure S4. <sup>1</sup>H NMR spectrum of **6** recorded in CDCl<sub>3</sub>

## 2.5Compound

7:

9-(4-(octyloxy)phenyl)-2-(4,4,5,5,-teramethyl-1,3,2-dioxaborolan-2-yl)-9H-fluoren-9-ol

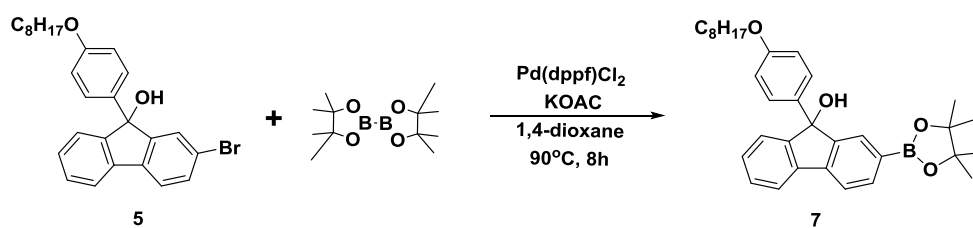

Under a nitrogen atmosphere, 2-bromo-9-(4-octyloxy)phenyl-9-fluorenol (17.18 mmol, 8 g), pinacol borate (51.57 mmol, 13.09 g, 3 eq), potassium acetate (103.08 mmol, 10.17 g, 6 eq), bistriphenylphosphine palladium dichloride (1.718 mmol, 1.2 g, 0.1 eq) were dissolved in 300 mL of 1,4-dioxane. After that, the mixture was stirred at reflux overnight at 90 °C. After cooling to room temperature, undissolved solid was filtered. The filtrate was concentrated under reduced pressure to obtain the crude product, which was purified by column chromatography using petroleum ether-dichloromethane-ethyl acetate (10:2:1, v/v) as the eluent to give pure 9-(4-(octyloxy)phenyl)-2-(4,4,5,5,-teramethyl-1,3,2-dioxaborolan-2-yl)-9H-fluoren-9-ol (6.34 g: 72%). <sup>1</sup>H NMR (400 MHz, CDCl<sub>3</sub>) δ 7.83 (dd, J = 7.5, 1.0 Hz, 1H), 7.78 (s, 1H), 7.67 (dd, J = 11.2, 4.1 Hz, 2H), 7.36 (td, J = 7.4, 1.3 Hz, 1 H), 7.34 – 7.30 (m, 2H), 7.30 – 7.26 (m, 2H), 7.25 (d, J = 1.0 Hz, 1H), 6.83–6.75 (m, 2H), 3.91 (t, J = 6.6 Hz, 2H), 2.49 (s, 1H), 1.79 – 1.70 (m, 2H), 1.42 (dd, J = 15.1, 6.9 Hz, 2H), 1.35 – 1.25 (m, 20H), 0.88 (t, J = 6.9 Hz, 3H).

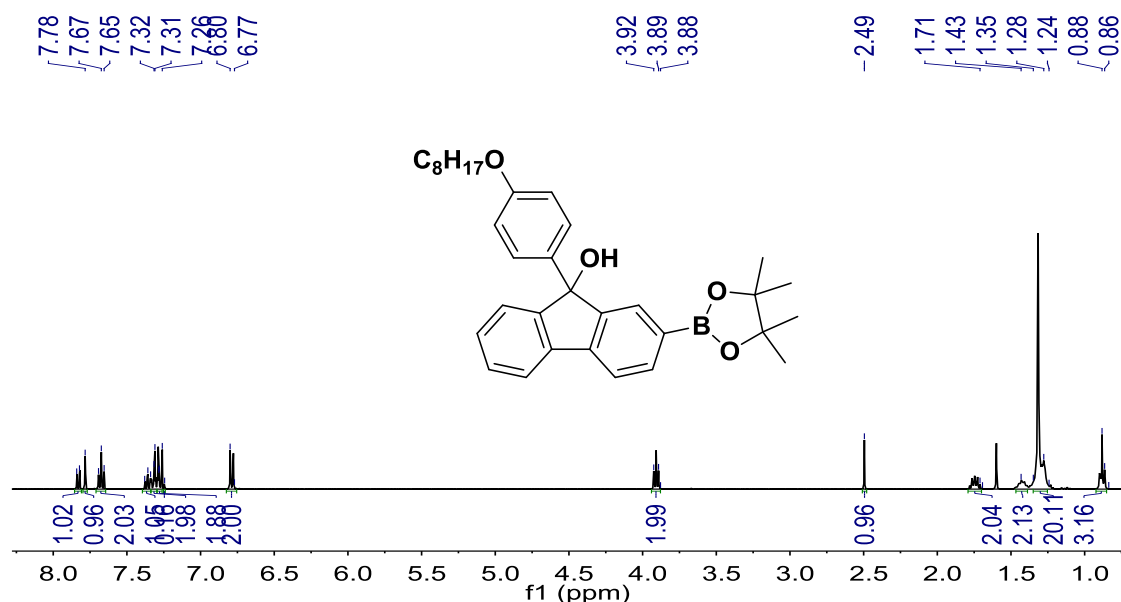

Figure S5. <sup>1</sup>H NMR spectrum of **7** recorded in CDCl<sub>3</sub>

## 2.6 Compound **8**: 2-(9H-carbazol-3-yl)-9-(4-octyloxy)phenyl)-9H-fluoren-9-ol



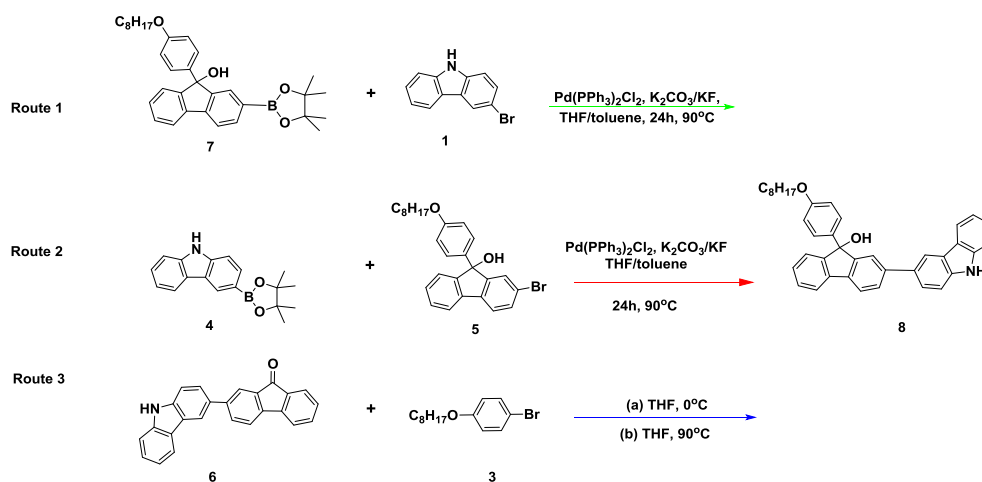

Route 1: 9-(4-n-octyloxyphenyl)-9-hydroxy-2-fluorene boronic acid pinacol ester (7.80 mmol, 4g), 3-bromocarbazole (11.7 mmol, 2.88 g, 1.5 eq), tetrabistriphenylpalladium (0.23 mmol, 0.27 g, 0.03 eq) were added to the three-necked flask under a nitrogen atmosphere reaction. Then 10.00 mL of dry Tol/THF (1:1, v/v) was added to disperse the powder. Under the protection of argon, the suspension was stirred at 90°C for 20 min, 30 mL of aqueous solution was poured into the reaction device, and refluxed at 90 °C for 24 h. After cooling to room temperature, undissolved solid was filtered. The filtrate was concentrated under reduced pressure to obtain the crude product, which was purified by column chromatography using petroleum ether-dichloromethane (4:1-1:1, v/v) as the eluent to give pure 2-(9H-carbazol-3-yl)-9-(4-octyloxy)phenyl)-9H-fluorene-9-ol (2.37 g, 53%).

Route 2: 2-bromo-9-(4-n-octyloxyphenyl)-9-fluorene-9-ol (8.59 mmol, 4 g), 3-carbazole boric acid pinacol ester (12.89 mmol, 3.78 g, 1.5 eq), tetrabistriphenylphosphoropalladium (0.26 mmol, 0.30 g, 0.03 eq) was dissolved in 50 mL of Tol/THF (1:1, v/v) at 90 °C for 20 min under a nitrogen atmosphere. Then 30 mL of K<sub>2</sub>CO<sub>3</sub> (2 M) / KF was added to disperse the powder and degassed in liquid nitrogen three times, and refluxed at 90 °C for 24 h. After cooling to room temperature, undissolved solid was filtered. The filtrate was concentrated under reduced pressure to obtain the crude product, which was purified by column chromatography using petroleum ether-dichloromethane (4:1-1:1, v/v) as the eluent to give pure 2-(9H-carbazol-3-yl)-9-(4-octyloxy)phenyl)-9H-fluorene-9-ol (2.6 g, 55%).

Route 3: Magnesium turning (25 mmol, 0.61 g), a grain of iodine, 10 mL of tetrahydrofuran, a small amount of p-bromo-n-octyloxybenzene (24 mmol, 6.85 g, 2 eq) were added into a dry Schlenk tube. Then 30.00 mL of dry THF was added to disperse the powder under a nitrogen atmosphere. Then it was initiated by a heating gun, the solution changed from turbid to clear, and the reaction was completed. Then the mixture was antiferred to an oil bath at 55°C for 3 hours until most magnesium fragments disappeared. Next, the above reaction solution was antiferred to a reaction flask with 2-(9H- carbazole -3- yl)-fluorenone (11.58 mmol, 4 g) and tetrahydrofuran (400 mL) at 90°C for 24 h. After the reaction was cooled to room temperature, the filtrate was concentrated under reduced pressure to obtain the crude product, which was purified by column chromatography using petroleum ether-dichloromethane (4:1, v/v) as the eluent to give pure 2-(9H-carbazol-3-yl)-9-(4-octyloxyphenyl)-9H-fluoren-9-ol (3.51 g, 49%). <sup>1</sup>H NMR (400 MHz, CDCl<sub>3</sub>) δ 8.26 (d, J = 1.4 Hz, 1H), 8.10 (t, J = 7.2 Hz, 1H), 8.07 (s, 1H), 7.72 (d, J = 14.8, 9.3, 5.8 Hz, 4H), 7.62 (dd, J = 8.4, 1.8 Hz, 1H), 7.45 – 7.40 (m, 3H), 7.38 (dd, J = 8.0, 2.5 Hz, 4H), 7.28 (dd, J = 5.7, 1.7 Hz, 1H), 7.26 – 7.23 (m, 1H), 6.82 (d, J = 8.9 Hz, 2H), 3.90 (t, J = 6.6 Hz, 2H), 2.59 (s, 1H), 1.78 – 1.70 (m, 2H), 1.28 (s, 10H), 0.88 (d, J = 4.7 Hz, 3H).

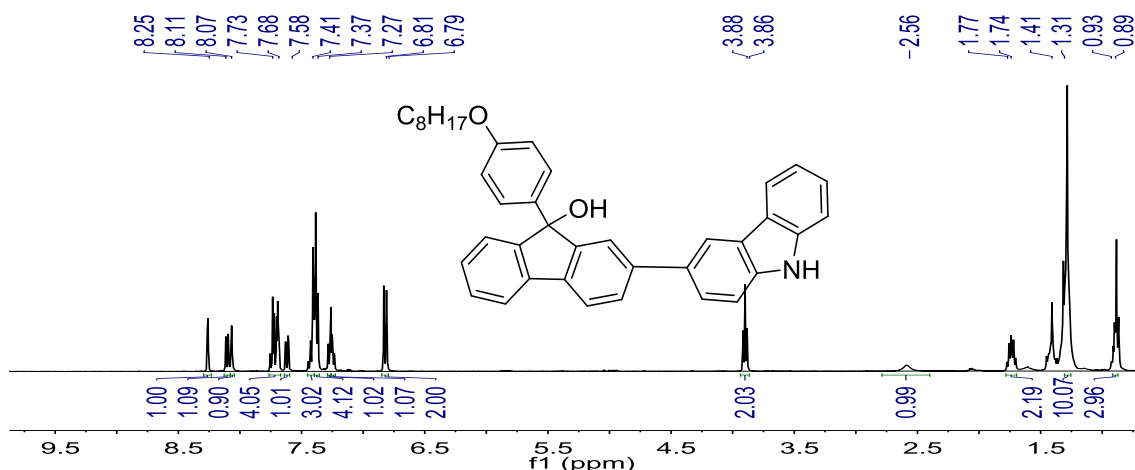

Figure S6. <sup>1</sup>H NMR spectrum of **8** recorded in CDCl<sub>3</sub>

## 2.7 Syntheses of *syn*-isomer, *anti*-isomer and *th*-isomer

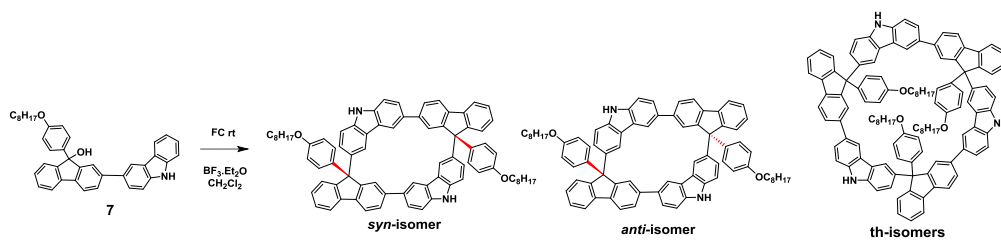

The synthon **7** (0.91 mmol, 0.5 g) was dissolved in 500 mL of methylene chloridconstant at pressure titration funnel and dropped into the reaction bottle with 1 mL boron trifluoride ether. Water was used to quench the reaction after it was completed. The organic layer was then separated from the aqueous layer, and dried with anhydrous Na<sub>2</sub>SO<sub>4</sub>. The filtrate was concentrated under reduced pressure to obtain the crude product, which was purified by column chromatography to obtain pure **syn-isomer** (0.12 g, 25%) MADLI-TOF-MS (m/z): cacl. For C<sub>78</sub>H<sub>70</sub>N<sub>2</sub>O<sub>2</sub>: 1066.543 [M<sup>+</sup>]; Found: 1066.881. <sup>1</sup>H NMR (400 MHz, CDCl<sub>3</sub>) δ 8.75 (d, J = 1.3 Hz, 2H), 8.59 (s, 2H), 8.24 (s, 2H), 7.96 (s, 2H), 7.85 (d, J = 7.4 Hz, 2H), 7.82 (d, J = 7.9 Hz, 2H), 7.77 (d, J = 8.0 Hz, 2H), 7.64 (d, J = 7.6 Hz, 2H), 7.55 (d, J = 7.4 Hz, 2H), 7.45 (t, J = 7.0 Hz, 2H), 7.41 – 7.35 (m, 2H), 7.32 – 7.28 (m, 2H), 7.28 – 7.25 (m, 2H), 7.18 (d, J = 8.5 Hz, 2H), 7.14 (d, J = 8.9 Hz, 4H), 6.76 (d, J = 9.0 Hz, 4H), 3.89 (t, J = 6.6 Hz, 4H), 1.78–1.70 (m, 4H), 1.31 (d, J = 7.6 Hz, 20H), 0.89 (t, J = 6.9 Hz, 6H).

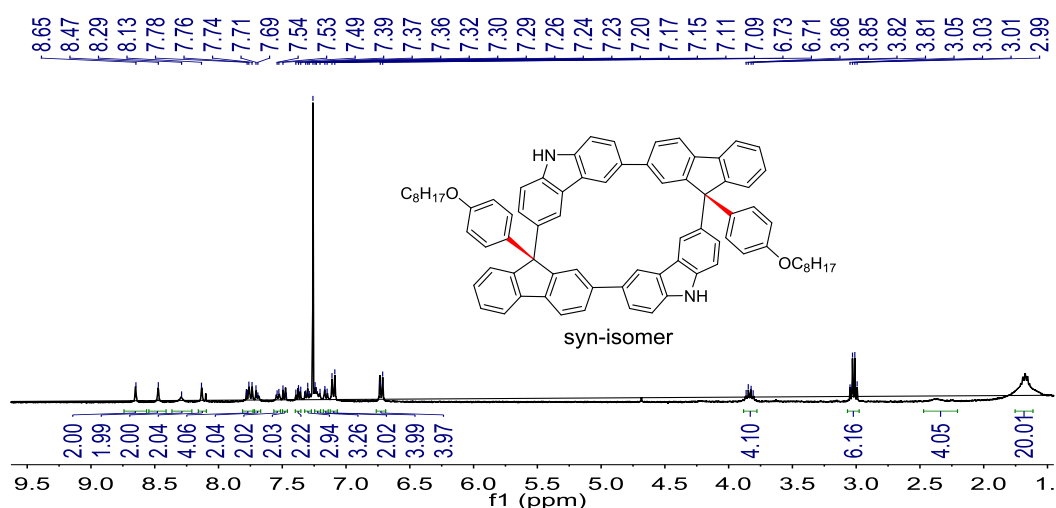

Figure S7. <sup>1</sup>H NMR spectrum of **syn-isomer** recorded in CDCl<sub>3</sub>

Then the second separation was carried out, using petroleum ether-dichloromethane (4:1-3:1, v/v) as the eluent to obtain **anti-isomer** (0.04 g, 9%) MADLI-TOF-MS (m/z): cacl. For C<sub>78</sub>H<sub>70</sub>N<sub>2</sub>O<sub>2</sub>: 1066.543 [M<sup>+</sup>]; Found: 1066.887. <sup>1</sup>H NMR (400 MHz, CDCl<sub>3</sub>) δ 8.76 (s, 2H), 8.34 (s, 2H), 8.29 (s, 2H), 8.04 (s, 2H), 7.91 (d, J = 7.7 Hz, 4H), 7.64 (d, J = 7.0 Hz, 6H), 7.57 (d, J = 8.0 Hz, 4H), 7.48 (t, J = 7.4 Hz, 2H), 7.45 – 7.37 (m, 4H), 6.77 (d, J = 8.7 Hz, 4H), 6.60 (d, J = 8.8 Hz, 4H), 3.79 (t, J = 6.6 Hz, 4H), 1.66 (d, J = 6.6 Hz, 4H), 1.29 (d, J = 10.4 Hz, 20H), 0.85 (d, J = 6.7 Hz, 6H).

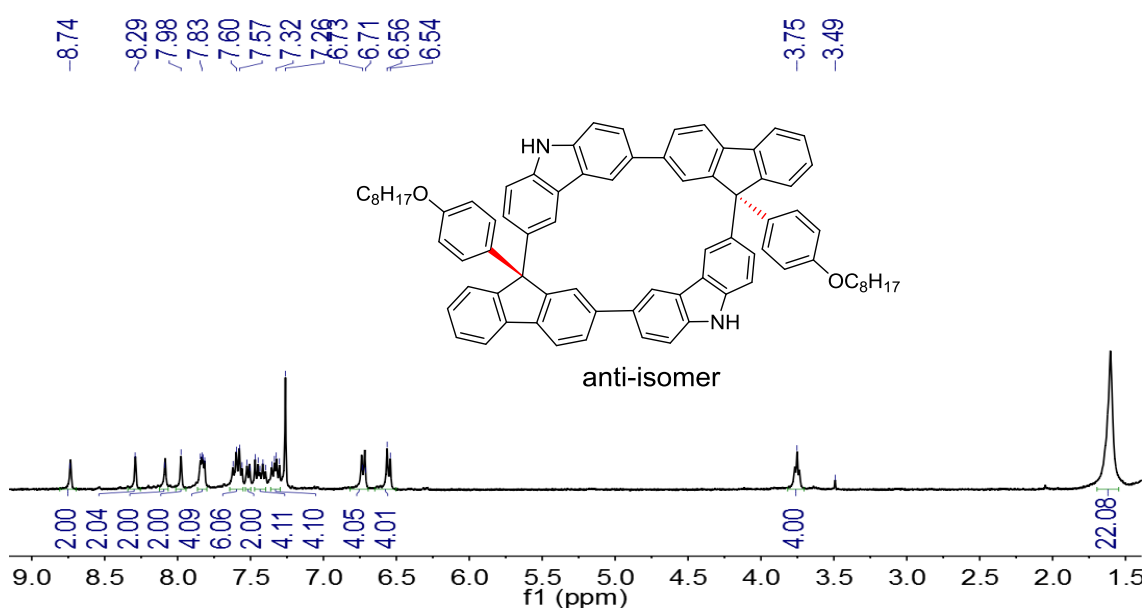

Figure S8. <sup>1</sup>H NMR spectrum of **anti-isomer** recorded in CDCl<sub>3</sub>

Petroleum ether-dichloromethane (3:1-2:1, v/v) was used as the eluent to obtain **th-isomer** (0.07 g, 6%) MADLI-TOF-MS (m/z): cacl. For C<sub>117</sub>H<sub>105</sub>N<sub>3</sub>O<sub>3</sub>: 1601.302[M<sup>+</sup>]; Found: 1061. <sup>1</sup>H NMR (400 MHz, CDCl<sub>3</sub>) δ 8.75 (dd, J = 25.7, 14.7 Hz, 2H), 8.39 – 8.25 (m, 2H), 8.18 (s, 1H), 8.07 – 8.00 (m, 3H), 7.97 (d, J = 6.0 Hz, 1H), 7.92 (d, J = 5.6 Hz, 1H), 7.90 (s, 1H), 7.84 (dd, J = 8.2, 3.3 Hz, 3H), 7.81 – 7.76 (m, 2H), 7.72 (d, J = 7.5 Hz, 2H), 7.68 – 7.61 (m, 2H), 7.60 – 7.55 (m, 2H), 7.52 (dd, J = 10.7, 7.0 Hz, 3H), 7.49 (s, 1H), 7.47 – 7.44 (m, 2H), 7.43 – 7.40 (m, 3H), 7.40 – 7.36 (m, 2H), 7.35 (s, 1H), 7.33 (s, 1H), 7.30 (d, J = 3.4 Hz, 1H), 7.22 (d, J = 8.7 Hz, 3H), 7.19 – 7.15 (m, 1H), 7.08 – 7.01 (m, 1H), 6.98 – 6.89 (m, 1H), 6.86 (d, J = 10.0

Hz, 1H), 6.79 (dd, J = 14.8, 8.9 Hz, 2H), 6.74 (dd, J = 8.8, 3.0 Hz, 2H), 6.66 (d, J = 8.9 Hz, 1H), 6.56 (dd, J = 11.4, 5.1 Hz, 3H), 6.45 (d, J = 9.0 Hz, 1H), 3.94 (dd, J = 12.2, 6.1 Hz, 2H), 3.75 (t, J = 6.3 Hz, 3H), 3.61 (t, J = 6.6 Hz, 1H), 1.82 - 1.63 (m, 6H), 1.35 (dd, J = 71.0, 21.8 Hz, 39H).

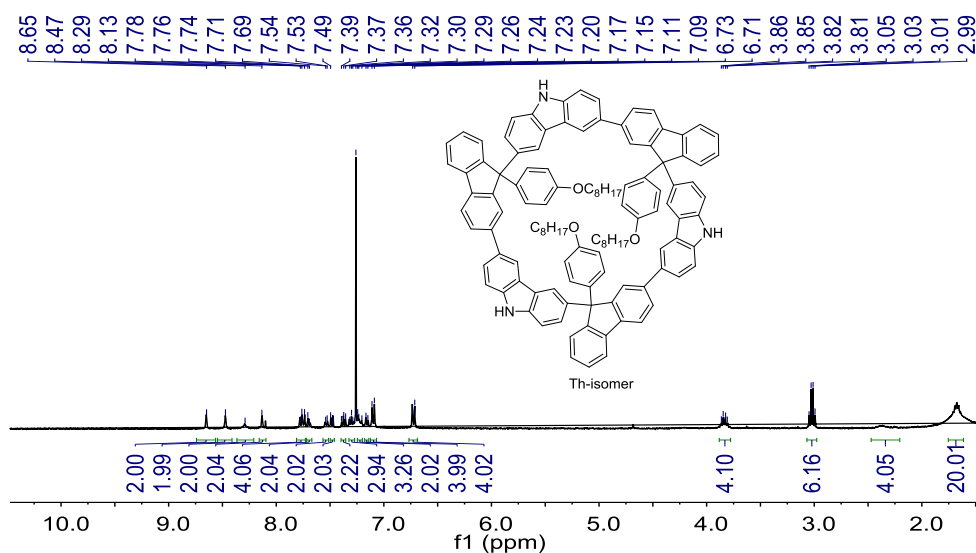

Figure S9.  $^1\text{H}$  NMR spectrum of **th-isomer** recorded in  $\text{CDCl}_3$

### 3. MALDI-TOF-MS of *syn/anti* isomers

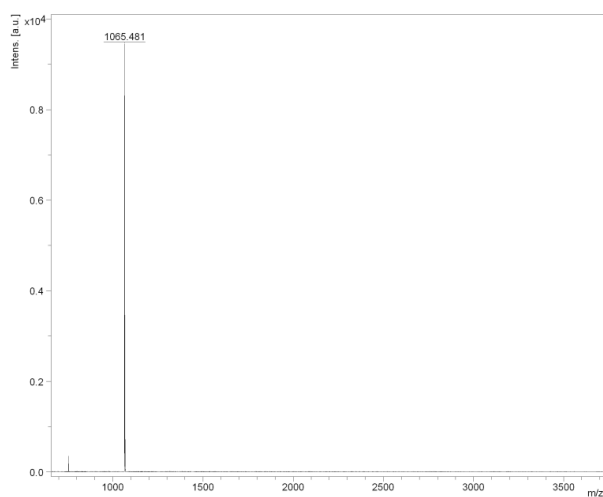

(a)

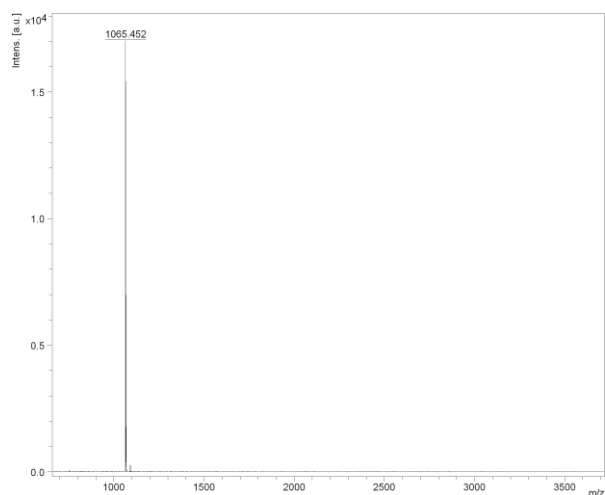

(b)

Figure S10. MALDI-TOF mass spectrum of *syn/anti* isomers: (a) *syn*-isomer (b) *anti*-isomer

#### 4. $^1\text{H}$ NMR of the *syn/anti* isomers

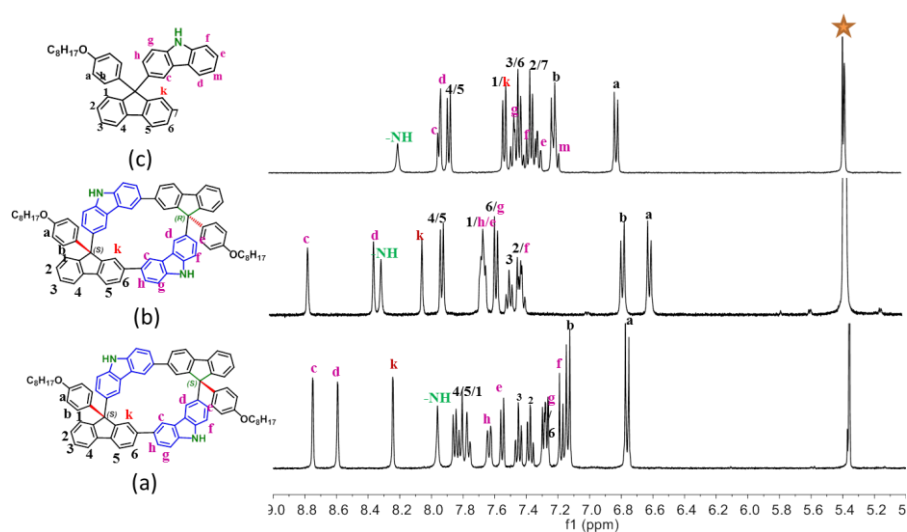

Figure S11.  $^1\text{H}$  NMR spectrum of *syn/anti* isomer recorded in  $\text{CD}_2\text{Cl}_2$ : (a) *syn*-isomer (b) *anti*-isomer

In order to better perform NMR analysis, we have synthesized the L-shaped molecule (c) and compared it with the two isomers in NMR spectra, as shown in Figure S11. In the Friedel-Crafts reaction, the **m** position in compound **c** is connected to the **3** position of another **c** molecule, causing the proton **d** to change from the original double peak to single peak, and it is in the de-shielding zone, so the electron cloud density decreases and shifts to low field. Moreover, due to the strong shielding effect of the isomers, the chemical shift of proton **d** is in a lower field. Proton **k** is

changed from the original double peak to single peak due to the ring reaction of the 7-position hydrogen atom. Due to the influence of carbazole, the unshielded zone of proton **k** is stronger than before, and its chemical shift shifts to a low field. The single crystal X-ray diffraction data confirms the results.

## 5. Optimized geometries of the two isomers of the 1:1 complex in gas phase by Gaussian computer program

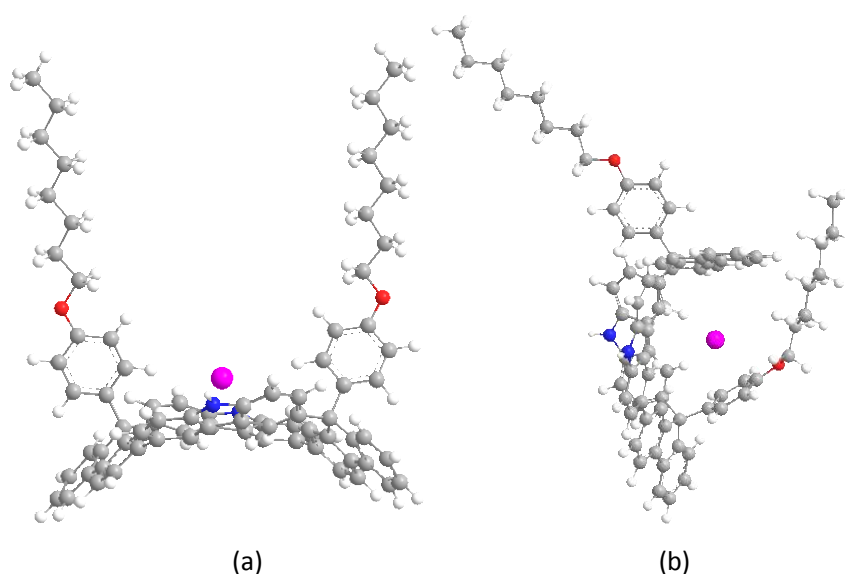

Figure S12. Energy-minimized structures of the two isomers of the 1:1 complex: (a) *syn-isomer* (b) *anti-isomer*  
(Nitrogen atoms are blue, oxygen atoms are red, hydrogen atoms are white, and iodine atoms are purple)

Computations were carried out by DFT methods in Gaussian 16 with a dispersion correction DFT-D3 (BJ).<sup>1</sup> B3LYP method with 6-31G\* basis set were employed to investigate the structure optimization. The Stuttgart–Dresden double-zeta valence basis set (SDD) with an effective core potential for 46 inner electrons was employed for iodine. Since the program uses a larger system with more basis functions, and an alternative basis function for a smaller system, there is basis set overlap error in the entire optimization calculation. We used the correction method proposed by Boys and Bernardi to perform the basis set superposition error (BSSE).<sup>2</sup> The optimized energies obtained for *syn-isomer* I<sup>-</sup> complex and *anti-isomer* I<sup>-</sup> complex are shown in Table S1.

Table S1 Optimized energies obtained for the two isomers of the 1:1 complex in gas phase at 298 K

| <i>syn</i> -isomer I <sup>-</sup> complex | Value / Hartree | <i>anti</i> -isomer I <sup>-</sup> complex | Value/Hartree |
|-------------------------------------------|-----------------|--------------------------------------------|---------------|
| $E_{syn\text{-isomer I}^-}$               | -3286.03030     | $E_{anti\text{-isomer I}^-}$               | -3286.04059   |
| $E_{syn\text{-isomer}}$                   | -3274.90734     | $E_{anti\text{-isomer}}$                   | -3274.90543   |
| $E_{I^-}$                                 | -10.93511       | $E_{I^-}$                                  | -10.93511     |
| $E_{syn\text{-isomer(BSSE)}}$             | -3274.83761     | $E_{anti\text{-isomer(BSSE)}}$             | -3274.83529   |
| $E_{I^- (BSSE)}$                          | -10.93703       | $E_{I^- (BSSE)}$                           | -10.93511     |
| $\Delta E_{cor(BSSE)}$                    | 0.00412         | $\Delta E_{cor(BSSE)}$                     | 0.00616       |
| $\Delta E$                                | -0.18785        | $\Delta E$                                 | -0.20005      |
| $\Delta E_{BSSE}$                         | -0.18373        | $\Delta E_{BSSE}$                          | -0.19389      |

$$\Delta E = E_{isomer I^-} - (E_{isomer} + E_{I^-})$$

$$\Delta E_{BSSE} = \Delta E + \Delta E_{cor(BSSE)}$$

$\Delta E_{cor(BSSE)}$  is calculated by Gaussian software.

## 6. UV-visible absorption of *syn/anti* isomers in CH<sub>2</sub>Cl<sub>2</sub> solution

Stock solutions of all the compounds studied were made up in CH<sub>2</sub>Cl<sub>2</sub>. ACS grade solvents were purchased and used without purification. The stock solutions were appropriately diluted with solvents to obtain concentrations suitable for study.

6. 1 UV-vis spectra of *syn*-isomer recorded in CH<sub>2</sub>Cl<sub>2</sub> after adding excess quantities of the indicated anions as their TBA<sup>+</sup> (tetrabutylammonium) salts (TBAF, TBACl and TBABr)

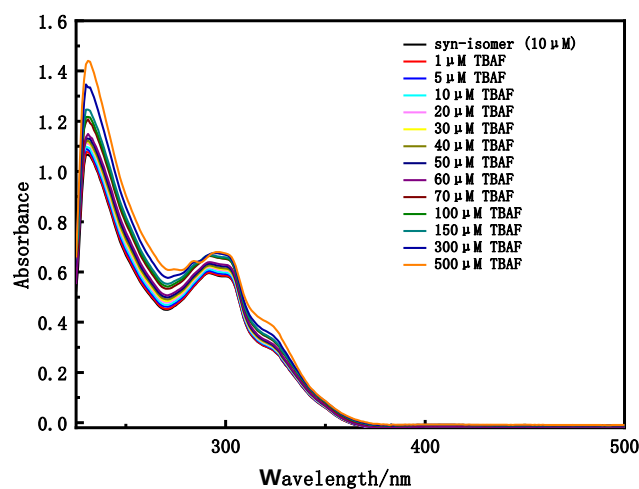

Figure S13. UV-vis spectra of *syn*-isomer (10 μM) recorded in CH<sub>2</sub>Cl<sub>2</sub> in the presence of increasing quantities of TBAF (tetrabutylammonium fluoride, 0~50 eq)



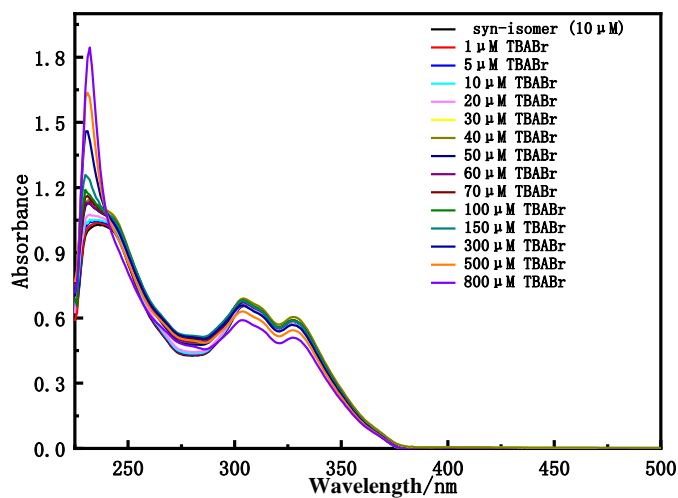

Figure S14. UV-vis spectra of *syn*-isomer (10 μM) recorded in CH<sub>2</sub>Cl<sub>2</sub> in the presence of increasing quantities of TBACl (tetrabutylammonium chloride, 0~50 eq)

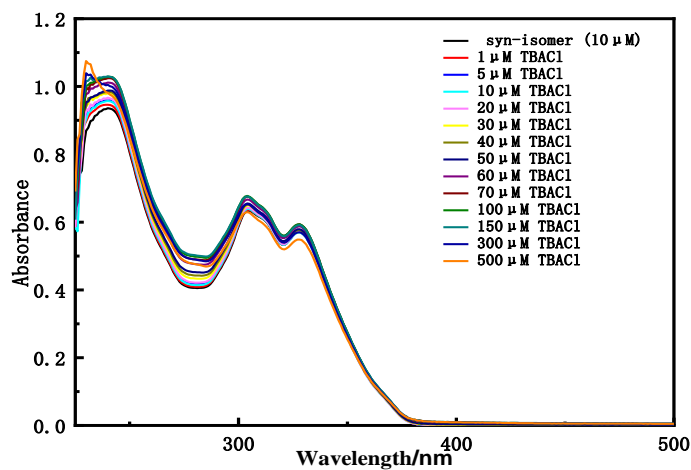

Figure S15. UV-vis spectra of *syn*-isomer (10 μM) recorded in CH<sub>2</sub>Cl<sub>2</sub> in the presence of increasing quantities of TBABr (tetrabutylammonium bromide, 0~80 eq)

6.2 UV-vis spectra of *anti-isomer* recorded in  $\text{CH}_2\text{Cl}_2$  after adding excess quantities of the indicated anions as their  $\text{TBA}^+$  (tetrabutylammonium) salts (TBAF, TBACl and TBABr)

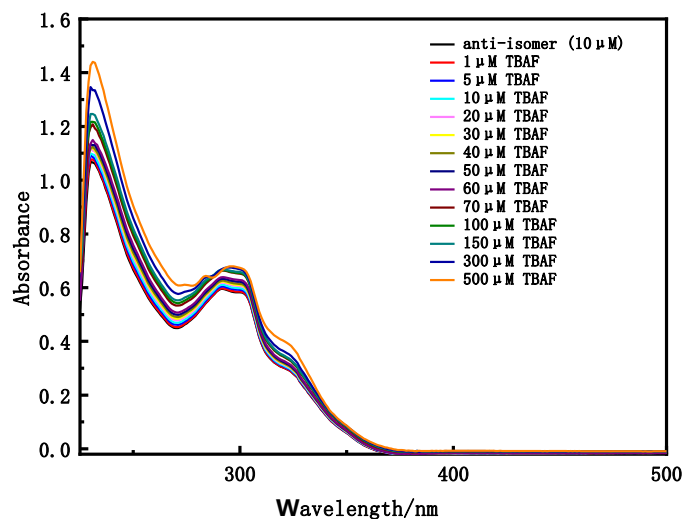

Figure S16. UV-vis spectra of *anti-isomer* (10 μM) recorded in  $\text{CH}_2\text{Cl}_2$  in the presence of increasing quantities of TBAF (tetrabutylammonium fluoride, 0~50 eq)

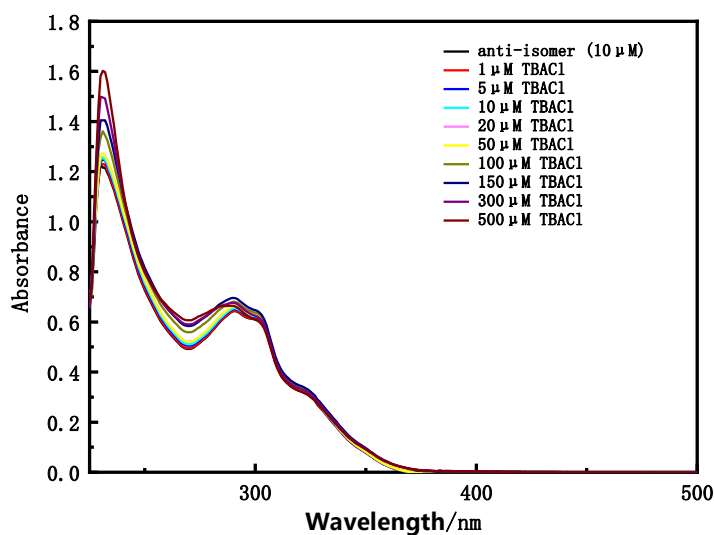

Figure S17. UV-vis spectra of *anti-isomer* (10 μM) recorded in  $\text{CH}_2\text{Cl}_2$  in the presence of increasing quantities of TBACl (tetrabutylammonium chloride, 0~50 eq)

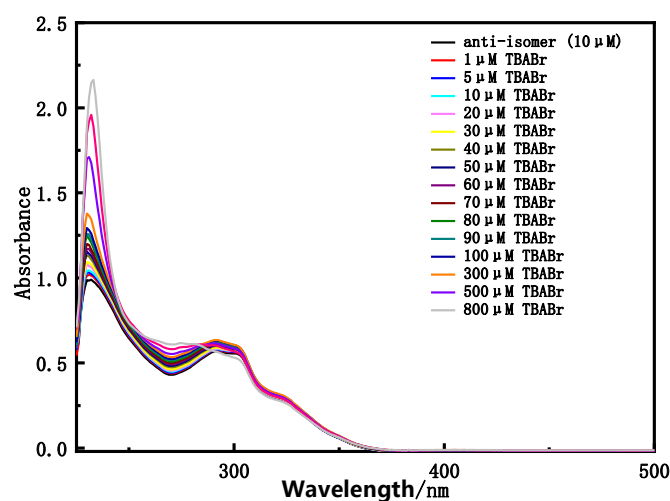

Figure S18. UV-vis spectra of *anti-isomer* (10  $\mu\text{M}$ ) recorded in  $\text{CH}_2\text{Cl}_2$  in the presence of increasing quantities of TBABr (tetrabutylammonium bromide, 0~80 eq)

## 7. Binding constants determined by UV-vis titrations

Upon addition of incremental amounts of anions to a  $\text{CH}_2\text{Cl}_2$  solution of *syn/anti isomers*, changes in the absorbance features of *syn/anti isomers* (10  $\mu\text{M}$  was used, unless otherwise stated) were seen.

### 7.1 Binding constants<sup>3</sup> determined by UV-vis titrations of *syn-isomer*

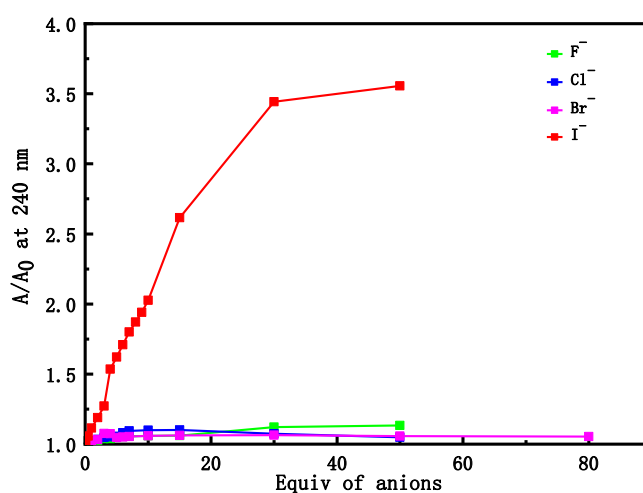

Figure S19. The corresponding binding isotherm for TBA+ (tetrabutylammonium) salts (TBAF, TBACl, TBABr and TBAI).

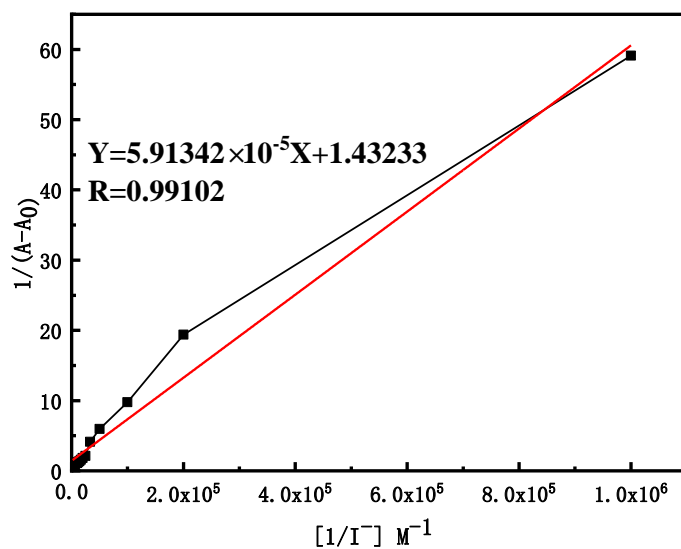

Figure S20. The Benesi-Hilderbrand diagram of *syn-isomer* with TBAI (tetrabutylammonium iodide)

Table S2 Calculation of the association constant of *syn-isomer* with TBAI (tetrabutylammonium iodide)

| Y=A+BX                                                                     |                        |                        |
|----------------------------------------------------------------------------|------------------------|------------------------|
| coefficient                                                                | value                  | error                  |
| A                                                                          | 1.43233                | 0.58714                |
| B                                                                          | 5.91342E <sup>-5</sup> | 2.21333E <sup>-6</sup> |
| K <sub>S</sub> = A/B = 2.422 × 10 <sup>4</sup>                             |                        |                        |
| ΔK <sub>S</sub> =  ΔA/A - ΔB/B  × K <sub>S</sub> = 0.902 × 10 <sup>4</sup> |                        |                        |
| K = K <sub>S</sub> + ΔK <sub>S</sub> = (2.422 ± 0.902) × 10 <sup>4</sup>   |                        |                        |

## 7.2 Binding constants determined by UV-vis titrations of *anti-isomer*

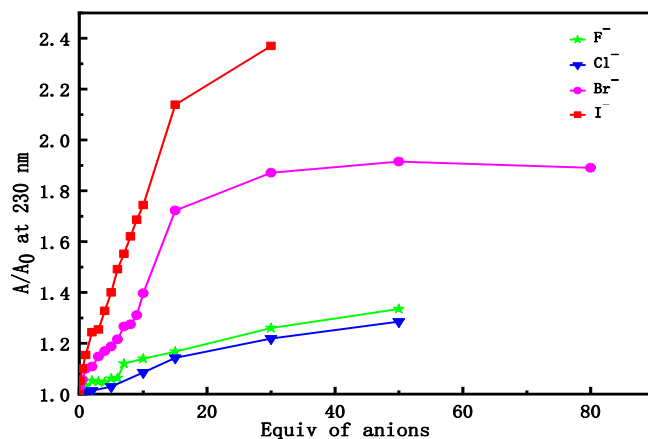

Figure S21. The corresponding binding isotherm for TBA+ (tetrabutylammonium) salts (TBAF, TBACl, TBABr and TBAI).

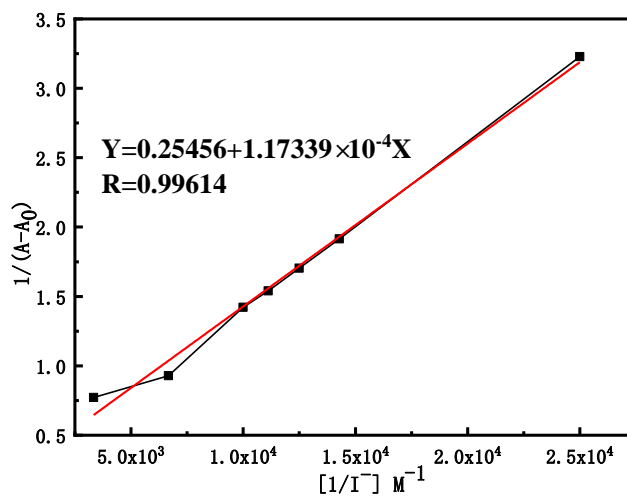

Figure S22. The Benesi-Hilderbrand diagram of *anti-isomer* with TBAI (tetrabutylammonium iodide)

Table S3 Calculation of the association constant K of *anti-isomer* with TBAI (tetrabutylammonium iodide)

| Y=A+BX      |       |       |
|-------------|-------|-------|
| coefficient | value | error |
|             |       |       |

|                                                                         |                           |                          |
|-------------------------------------------------------------------------|---------------------------|--------------------------|
| A                                                                       | 0.25456                   | 0.06218                  |
| B                                                                       | $1.173992 \times 10^{-4}$ | $4.62657 \times 10^{-6}$ |
| $KS = A/B = 2.168 \times 10^3$                                          |                           |                          |
| $\Delta K_s =  \Delta A/A - \Delta B/B  \times K_s = 0.445 \times 10^3$ |                           |                          |
| $K = K_s + \Delta K_s = (2.168 \pm 0.445) \times 10^3$                  |                           |                          |

## 8. Fluorescence emission spectra of *syn/anti* isomers in CH<sub>2</sub>Cl<sub>2</sub> solution

Stock solutions of all the compounds studied were made up in CH<sub>2</sub>Cl<sub>2</sub>. ACS grade solvents were purchased and used without purification. The stock solutions were appropriately diluted with solvents to obtain concentrations suitable for study.

### 8.1 Fluorescence emission spectra of *syn*-isomer recorded in CH<sub>2</sub>Cl<sub>2</sub> after adding excess quantities of the indicated anions as their TBA<sup>+</sup> (tetrabutylammonium) salts (TBAF, TBACl and TBABr)

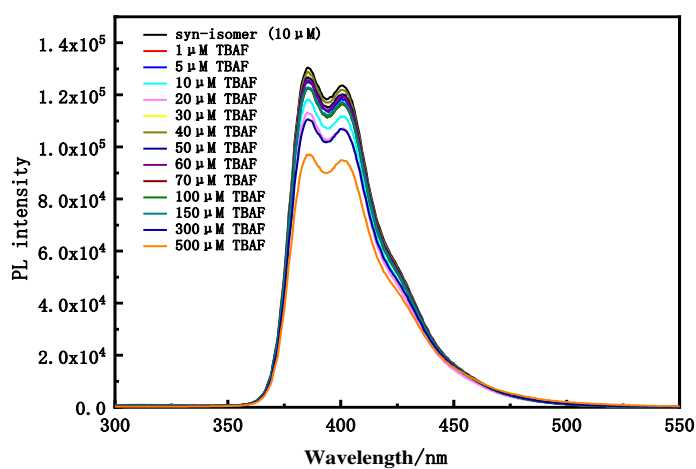

Figure S23. Fluorescence spectra of *syn*-isomer (10 μM) recorded in CH<sub>2</sub>Cl<sub>2</sub> in the presence of increasing quantities of TBAF (tetrabutylammonium fluoride, 0~50 eq)

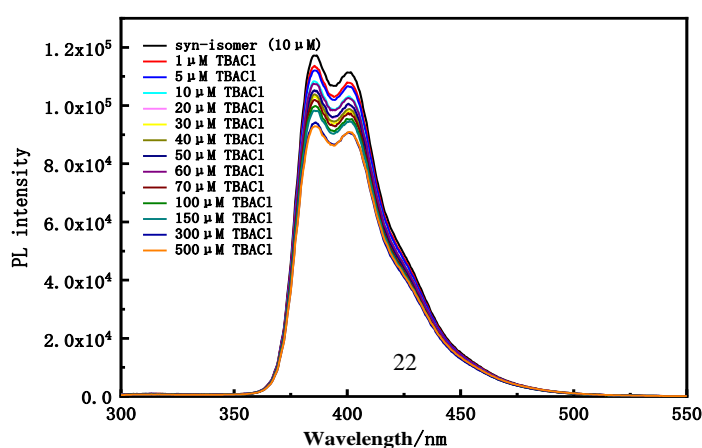

Figure S24. Fluorescence spectra of *syn-isomer* (10  $\mu\text{M}$ ) recorded in  $\text{CH}_2\text{Cl}_2$  in the presence of increasing quantities of TBACl (tetrabutylammonium chloride, 0~50 eq)

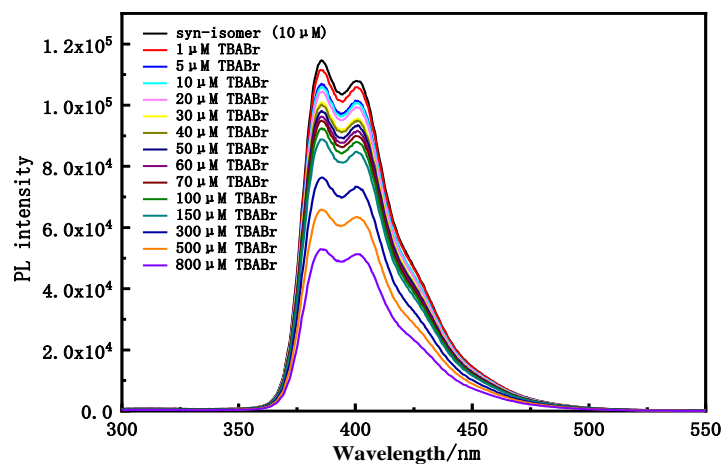

Figure S25. Fluorescence spectra of *syn-isomer* (10  $\mu\text{M}$ ) recorded in  $\text{CH}_2\text{Cl}_2$  in the presence of increasing quantities of TBABr (tetrabutylammonium bromide, 0~80 eq)

8.2 Fluorescence emission spectra of *anti-isomer* recorded in  $\text{CH}_2\text{Cl}_2$  after adding excess quantities of the indicated anions as their TBA+ (tetrabutylammonium) salts (TBAF, TBACl and TBABr)

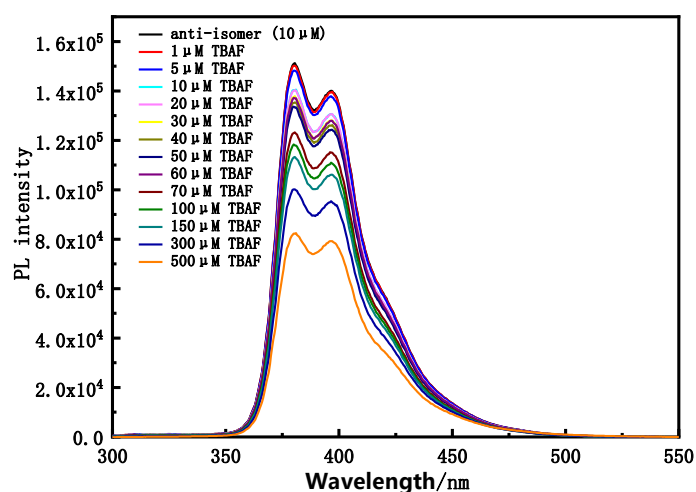

Figure S26. Fluorescence spectra of *anti-isomer* (10  $\mu\text{M}$ ) recorded in  $\text{CH}_2\text{Cl}_2$  in the presence of increasing quantities of TBAF (tetrabutylammonium fluoride, 0~50 eq)

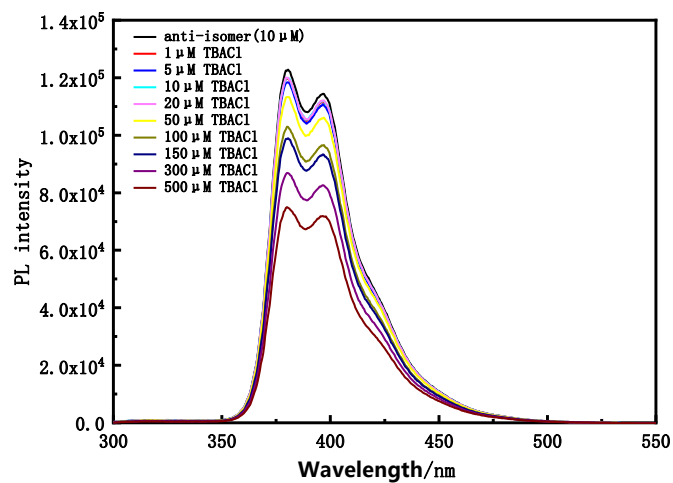

Figure S27. Fluorescence spectra of *anti-isomer* (10 μM) recorded in CH<sub>2</sub>Cl<sub>2</sub> in the presence of increasing quantities of TBACl (tetrabutylammonium chloride, 0~50 eq)

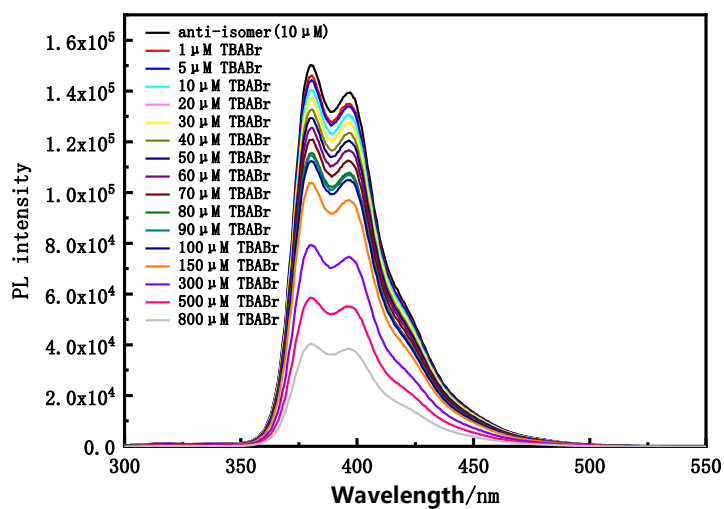

Figure S28. Fluorescence spectra of *anti-isomer* (10 μM) recorded in CH<sub>2</sub>Cl<sub>2</sub> in the presence of increasing quantities of TBABr (tetrabutylammonium bromide, 0~80 eq)



## 9. Fluorescence spectral changes of *syn/anti* isomers in CH<sub>2</sub>Cl<sub>2</sub>

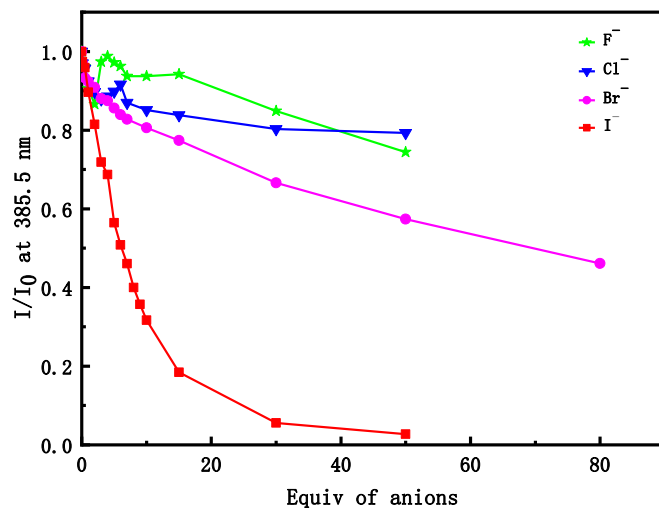

Figure S29. Fluorescence spectrum changes of *syn-isomer* in CH<sub>2</sub>Cl<sub>2</sub> interacting with TBAX (TBAF, TBACl, TBABr and TBAI)

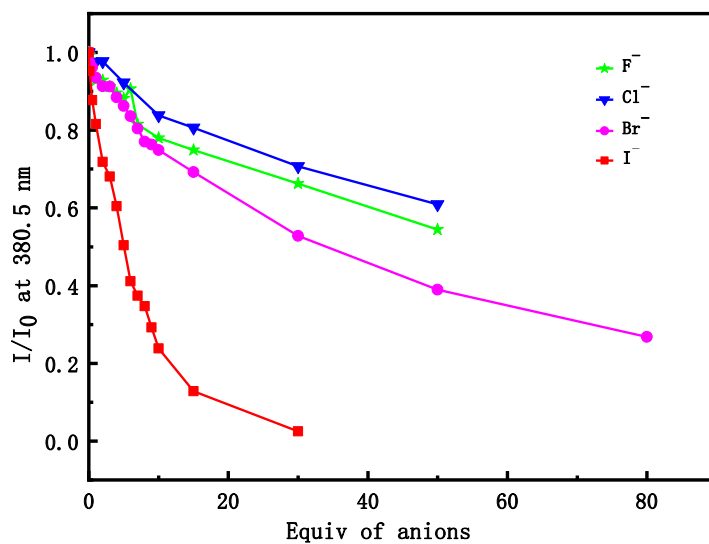

Figure S30. Fluorescence spectrum changes of *anti-isomer* in CH<sub>2</sub>Cl<sub>2</sub> interacting with TBAX (TBAF, TBACl, TBABr and TBAI)

## 10. Single crystal X-ray diffraction data for *syn-isomer*

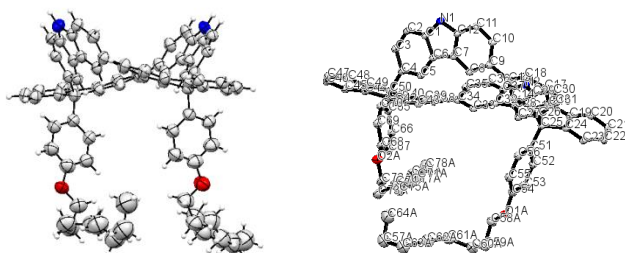

(a)

(b)

Figure S31. Single crystal structure and ellipsometry of *syn-isomer*

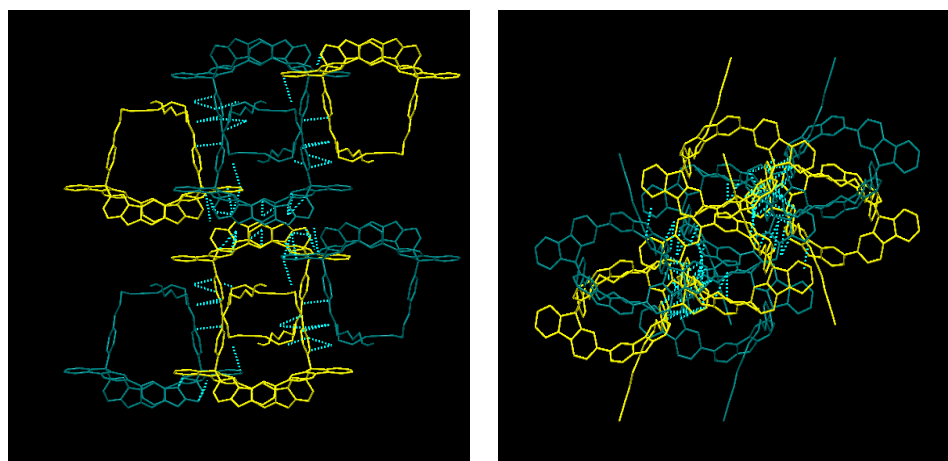

Figure S32. Interaction forces in *syn-isomer* single crystal

Table S4 Single crystal data of *syn-isomer*

| Name           | <i>syn-isomer</i>                                             |
|----------------|---------------------------------------------------------------|
| CCDC NO.       | 1911554                                                       |
| Formula sum    | C <sub>78</sub> H <sub>70</sub> N <sub>2</sub> O <sub>2</sub> |
| Formula weight | 1067.36g/mol                                                  |
| Crystal system | orthorhombic                                                  |
| Space-group    | P b c a (61)                                                  |
| a [Å]          | 21.2514(3)                                                    |
| b [Å]          | 16.3136(3)                                                    |
| c [Å]          | 36.1817(6)                                                    |
| a/b            | 1.3027                                                        |
| b/c            | 0.4509                                                        |
| c/a            | 1.7026                                                        |
| Cell volume    | 12543.72(40) Å <sup>3</sup>                                   |
| z              | 8                                                             |

|                  |                          |
|------------------|--------------------------|
| Calc. density    | 1.13031g/cm <sup>3</sup> |
| Rall             | 0.1597                   |
| Pearson code     | oP1632                   |
| Formula type     | NOP35Q39                 |
| Wyckoff sequence | c204                     |

---

## 11. Cartesian coordinates of the optimized compounds

### **Anti-isomer:**

|   |             |             |             |
|---|-------------|-------------|-------------|
| C | -1.25630700 | 0.94507700  | 3.02042100  |
| C | -0.28528300 | -0.05293700 | 3.46531700  |
| C | -0.31294600 | -0.02342000 | 4.88863000  |
| N | -1.25528600 | 0.89880800  | 5.30127300  |
| C | -1.85036600 | 1.47748400  | 4.19510800  |
| C | -2.88438400 | 2.41090000  | 4.14139600  |
| C | -3.29074800 | 2.84797200  | 2.89116400  |
| C | -2.67128300 | 2.41159900  | 1.69885200  |
| C | -1.66297400 | 1.44637800  | 1.77157500  |
| C | 0.54482700  | -0.98801900 | 2.82745300  |
| C | 1.35039400  | -1.85362600 | 3.58760000  |
| C | 1.34149300  | -1.72641800 | 4.99858300  |
| C | 0.51503900  | -0.83378300 | 5.66111300  |
| C | 4.84252800  | -5.78920900 | 1.27824400  |
| C | 3.88904300  | -4.94330600 | 2.00081600  |
| C | 3.59231000  | -3.81253500 | 1.21878000  |
| C | 4.26173800  | -3.93615100 | -0.16489300 |
| C | 5.10841300  | -5.19851300 | 0.02905200  |
| C | 6.01652600  | -5.77451100 | -0.84742400 |
| C | 6.65596900  | -6.96267900 | -0.47501000 |
| C | 6.38520500  | -7.55824900 | 0.76157000  |
| C | 5.47856200  | -6.97469600 | 1.64922500  |
| C | 3.29730400  | -5.09381700 | 3.25376300  |
| C | 2.44892300  | -4.09697700 | 3.72375700  |
| C | 2.19375200  | -2.92016300 | 2.98655100  |
| C | 2.76979600  | -2.80452200 | 1.70626500  |
| C | 5.14883000  | -2.74984200 | -0.54122700 |
| C | 5.46557100  | -2.48917400 | -1.88380300 |
| C | 6.33744800  | -1.46728200 | -2.23307300 |
| C | 6.92252300  | -0.66940100 | -1.24057500 |
| C | 6.62161000  | -0.91693700 | 0.10238200  |
| C | 5.74476900  | -1.95157500 | 0.43594900  |
| C | 1.18311600  | -3.26432200 | -2.28860500 |

|   |              |             |             |
|---|--------------|-------------|-------------|
| C | 0.12347400   | -2.37149200 | -2.68827800 |
| C | -0.88636400  | -3.16399000 | -3.29148800 |
| N | -0.43657500  | -4.48117400 | -3.32977400 |
| C | 0.79039400   | -4.57043700 | -2.67649100 |
| C | 1.57782100   | -5.67250400 | -2.34908700 |
| C | 2.72839500   | -5.45197900 | -1.58939600 |
| C | 3.11990300   | -4.16417500 | -1.17387200 |
| C | 2.34943000   | -3.06687200 | -1.55767700 |
| C | -0.08238800  | -1.01176800 | -2.48848300 |
| C | -1.30715100  | -0.43998900 | -2.83718900 |
| C | -2.30483600  | -1.24194200 | -3.42733100 |
| C | -2.10373700  | -2.60045200 | -3.67850200 |
| C | -1.80626300  | 4.80520100  | -0.65549900 |
| C | -1.58373800  | 3.56568200  | -1.40201800 |
| C | -2.38203400  | 2.55260200  | -0.84200500 |
| C | -3.14582700  | 3.06628700  | 0.38240700  |
| C | -2.73675900  | 4.55497500  | 0.37171700  |
| C | -3.15921600  | 5.59739100  | 1.18826000  |
| C | -2.63213200  | 6.87870400  | 0.99327700  |
| C | -1.69044400  | 7.11755100  | -0.01184200 |
| C | -1.27408100  | 6.08051700  | -0.84725600 |
| C | -0.76095000  | 3.29299200  | -2.49386000 |
| C | -0.71908900  | 1.99265700  | -2.99475800 |
| C | -1.51657700  | 0.97650200  | -2.44421800 |
| C | -2.38123700  | 1.27590400  | -1.37849300 |
| C | -4.65092100  | 2.85769500  | 0.16677000  |
| C | -5.40418500  | 3.77113300  | -0.58620300 |
| C | -6.74543100  | 3.54402000  | -0.85969300 |
| C | -7.37611100  | 2.38371300  | -0.38997600 |
| C | -6.63949000  | 1.45832500  | 0.35506100  |
| C | -5.29047000  | 1.70400700  | 0.62364300  |
| O | 7.75821300   | 0.31461500  | -1.68163600 |
| C | 14.05742100  | 8.09536000  | -0.83248500 |
| C | 13.17185400  | 7.09006900  | -0.09243500 |
| C | 12.45356200  | 6.11791300  | -1.03338400 |
| C | 11.56553300  | 5.10722200  | -0.30204500 |
| C | 10.84760800  | 4.13650600  | -1.24380100 |
| C | 9.96214900   | 3.12476300  | -0.51031000 |
| C | 9.24663300   | 2.15873100  | -1.45892400 |
| C | 8.37597800   | 1.15904600  | -0.71538600 |
| O | -8.69719100  | 2.25265100  | -0.70641700 |
| C | -17.69389400 | -2.20958500 | -0.97607300 |
| C | -16.24722900 | -2.29541600 | -0.48381400 |
| C | -15.40152600 | -1.08649000 | -0.89579000 |

|   |              |             |             |
|---|--------------|-------------|-------------|
| C | -13.95188700 | -1.16301300 | -0.40834100 |
| C | -13.10774600 | 0.04576200  | -0.82178400 |
| C | -11.65781500 | -0.03257800 | -0.33474100 |
| C | -10.82069200 | 1.17925900  | -0.75392000 |
| C | -9.38434300  | 1.08636300  | -0.26535900 |
| H | -1.50095000  | 1.08830000  | 6.25986300  |
| H | -3.36171900  | 2.77852500  | 5.04538000  |
| H | -4.12167100  | 3.54019000  | 2.82717800  |
| H | -1.18687200  | 1.08692900  | 0.86668400  |
| H | 0.52961600   | -1.07491600 | 1.74448100  |
| H | 2.01399700   | -2.34218600 | 5.58488600  |
| H | 0.51681800   | -0.76871800 | 6.74554400  |
| H | 6.23103500   | -5.30763300 | -1.80431900 |
| H | 7.37116000   | -7.42373200 | -1.15032400 |
| H | 6.89049400   | -8.47979900 | 1.03708500  |
| H | 5.27906200   | -7.43397600 | 2.61371800  |
| H | 3.48485400   | -5.97843300 | 3.85658000  |
| H | 1.95969400   | -4.23712500 | 4.68143100  |
| H | 2.59281600   | -1.91077400 | 1.11651900  |
| H | 5.00831500   | -3.08721000 | -2.66562400 |
| H | 6.57692500   | -1.26207500 | -3.27158300 |
| H | 7.05621600   | -0.31632500 | 0.89241000  |
| H | 5.52305300   | -2.13325800 | 1.48233500  |
| H | -1.00566400  | -5.27265800 | -3.58572500 |
| H | 1.29772500   | -6.68015100 | -2.64276900 |
| H | 3.32620600   | -6.30631700 | -1.29474500 |
| H | 2.63850900   | -2.06541800 | -1.25569000 |
| H | 0.67672100   | -0.40292600 | -2.00581600 |
| H | -3.25482100  | -0.78636900 | -3.69138600 |
| H | -2.88594500  | -3.20023200 | -4.13523700 |
| H | -3.89976200  | 5.43705900  | 1.96362700  |
| H | -2.96274000  | 7.69561600  | 1.62848800  |
| H | -1.28843200  | 8.11742200  | -0.14942900 |
| H | -0.55381600  | 6.26570200  | -1.63954200 |
| H | -0.14542400  | 4.07168900  | -2.93612500 |
| H | -0.05437100  | 1.74720300  | -3.81791600 |
| H | -2.99136700  | 0.48903400  | -0.94456700 |
| H | -4.93154800  | 4.67259500  | -0.96205200 |
| H | -7.32942900  | 4.25338700  | -1.43743300 |
| H | -7.09809300  | 0.55244100  | 0.73321200  |
| H | -4.73305400  | 0.98068800  | 1.20973200  |
| H | 14.55868200  | 8.77811900  | -0.13731600 |
| H | 14.83260100  | 7.58339100  | -1.41564900 |
| H | 13.46704700  | 8.70218500  | -1.52983400 |

|   |              |             |             |
|---|--------------|-------------|-------------|
| H | 12.42571000  | 7.62893000  | 0.50826000  |
| H | 13.78127800  | 6.51804300  | 0.62126200  |
| H | 13.19925700  | 5.57835700  | -1.63569200 |
| H | 11.84272400  | 6.68913500  | -1.74789000 |
| H | 10.82038100  | 5.64700200  | 0.30052300  |
| H | 12.17694800  | 4.53591400  | 0.41176600  |
| H | 11.59154300  | 3.59675900  | -1.84731500 |
| H | 10.23374600  | 4.70639800  | -1.95609500 |
| H | 9.21889900   | 3.66491100  | 0.09394300  |
| H | 10.57713700  | 2.55425600  | 0.20081000  |
| H | 9.98016200   | 1.60718800  | -2.06045300 |
| H | 8.61758300   | 2.71745300  | -2.16333200 |
| H | 7.60686000   | 1.67712000  | -0.12365800 |
| H | 8.98123500   | 0.55625800  | -0.02230000 |
| H | -18.27616500 | -3.08538000 | -0.66850200 |
| H | -18.19389200 | -1.31864900 | -0.57695000 |
| H | -17.73490800 | -2.14827600 | -2.07042800 |
| H | -15.78019100 | -3.21176600 | -0.87129800 |
| H | -16.23581100 | -2.38789200 | 0.61130400  |
| H | -15.86786600 | -0.16864900 | -0.50846000 |
| H | -15.41246000 | -0.99270400 | -1.99169000 |
| H | -13.48616300 | -2.08109200 | -0.79561900 |
| H | -13.94125100 | -1.25625900 | 0.68753000  |
| H | -13.57148100 | 0.96414900  | -0.43386800 |
| H | -13.11748500 | 0.13959100  | -1.91724800 |
| H | -11.19471700 | -0.95149300 | -0.72272300 |
| H | -11.64829800 | -0.12535000 | 0.76102100  |
| H | -11.26712400 | 2.10119800  | -0.36044200 |
| H | -10.81441300 | 1.27404200  | -1.84708800 |
| H | -8.89413500  | 0.18725100  | -0.66726900 |
| H | -9.35008400  | 1.02262800  | 0.83244900  |

### Syn-isomer:

|   |             |             |            |
|---|-------------|-------------|------------|
| C | 1.53521600  | -2.10065700 | 3.28161900 |
| C | 0.09839600  | -2.26989400 | 3.35367300 |
| C | -0.31051800 | -1.77662800 | 4.62224000 |
| N | 0.81097300  | -1.29979100 | 5.28664200 |
| C | 1.93240100  | -1.47077600 | 4.48750700 |
| C | 3.26151600  | -1.10280400 | 4.70299300 |
| C | 4.18313400  | -1.39531100 | 3.70518800 |
| C | 3.82789100  | -2.07562700 | 2.51740400 |
| C | 2.49424000  | -2.42324600 | 2.31485500 |
| C | -0.86256800 | -2.75392600 | 2.46407900 |

|   |             |             |             |
|---|-------------|-------------|-------------|
| C | -2.20717600 | -2.78219300 | 2.84338600  |
| C | -2.57890600 | -2.32924900 | 4.12674700  |
| C | -1.64606500 | -1.81485400 | 5.02368500  |
| C | -5.91411100 | -4.59160400 | -1.12434400 |
| C | -5.04383500 | -4.29261300 | 0.01515600  |
| C | -4.42373200 | -3.04949700 | -0.20234200 |
| C | -4.93202100 | -2.40540600 | -1.50274300 |
| C | -5.85729600 | -3.51716600 | -2.03283800 |
| C | -6.60556600 | -3.55843900 | -3.20263900 |
| C | -7.40397000 | -4.67712300 | -3.46519200 |
| C | -7.45572200 | -5.74401400 | -2.56319600 |
| C | -6.71023000 | -5.70753100 | -1.38411400 |
| C | -4.78813800 | -5.01608800 | 1.17992200  |
| C | -3.88501200 | -4.50233500 | 2.10957200  |
| C | -3.23054500 | -3.28056900 | 1.88529400  |
| C | -3.52389200 | -2.54406800 | 0.72493500  |
| C | -5.71750700 | -1.13657700 | -1.11797100 |
| C | -7.07652900 | -1.19106500 | -0.77708500 |
| C | -7.75585100 | -0.05880500 | -0.34766500 |
| C | -7.08882400 | 1.16825100  | -0.23997100 |
| C | -5.73165200 | 1.24014300  | -0.56951600 |
| C | -5.06426200 | 0.09248900  | -1.00183700 |
| C | -1.53525600 | -2.10073700 | -3.28162400 |
| C | -0.09843800 | -2.26999300 | -3.35367200 |
| C | 0.31048400  | -1.77676700 | -4.62225200 |
| N | -0.81100500 | -1.29995900 | -5.28668000 |
| C | -1.93243300 | -1.47089200 | -4.48753400 |
| C | -3.26154300 | -1.10291100 | -4.70303200 |
| C | -4.18316400 | -1.39537000 | -3.70521500 |
| C | -3.82792800 | -2.07564400 | -2.51740500 |
| C | -2.49428300 | -2.42327800 | -2.31484800 |
| C | 0.86252000  | -2.75401000 | -2.46406400 |
| C | 2.20712900  | -2.78229600 | -2.84336500 |
| C | 2.57886800  | -2.32938300 | -4.12673400 |
| C | 1.64603300  | -1.81500800 | -5.02369000 |
| C | 5.91401600  | -4.59167600 | 1.12442400  |
| C | 5.04374800  | -4.29269800 | -0.01508600 |
| C | 4.42368200  | -3.04955600 | 0.20237100  |
| C | 4.93198200  | -2.40544000 | 1.50275600  |
| C | 5.85723000  | -3.51720700 | 2.03288400  |
| C | 6.60550400  | -3.55846300 | 3.20268400  |
| C | 7.40387700  | -4.67716000 | 3.46527100  |
| C | 7.45559800  | -5.74408200 | 2.56331000  |
| C | 6.71010400  | -5.70761600 | 1.38422900  |

|   |             |             |             |
|---|-------------|-------------|-------------|
| C | 4.78803000  | -5.01620400 | -1.17982600 |
| C | 3.88491900  | -4.50245800 | -2.10949300 |
| C | 3.23048900  | -3.28066400 | -1.88525800 |
| C | 3.52385800  | -2.54413100 | -0.72492500 |
| C | 5.71749300  | -1.13663600 | 1.11795600  |
| C | 7.07649700  | -1.19116600 | 0.77700200  |
| C | 7.75583500  | -0.05892400 | 0.34756100  |
| C | 7.08884500  | 1.16815700  | 0.23991600  |
| C | 5.73169200  | 1.24009000  | 0.56953200  |
| C | 5.06428400  | 0.09245400  | 1.00187200  |
| O | -7.84227600 | 2.22346200  | 0.18649600  |
| C | -9.65392500 | 11.72492300 | 2.90345400  |
| C | -8.61081700 | 10.72246600 | 2.40394200  |
| C | -9.17920500 | 9.31342100  | 2.20901500  |
| C | -8.14299800 | 8.30281300  | 1.70918600  |
| C | -8.71233000 | 6.89465500  | 1.51519900  |
| C | -7.67451600 | 5.88539100  | 1.01526900  |
| C | -8.25114700 | 4.47959200  | 0.82484900  |
| C | -7.20894200 | 3.49045500  | 0.32900500  |
| O | 7.84231100  | 2.22334700  | -0.18657600 |
| C | 9.65414500  | 11.72477900 | -2.90351000 |
| C | 8.61102900  | 10.72235100 | -2.40395500 |
| C | 9.17937800  | 9.31328500  | -2.20907600 |
| C | 8.14316400  | 8.30270600  | -1.70920600 |
| C | 8.71245700  | 6.89452700  | -1.51526500 |
| C | 7.67463400  | 5.88529200  | -1.01529400 |
| C | 8.25122700  | 4.47947100  | -0.82492200 |
| C | 7.20901400  | 3.49036400  | -0.32903700 |
| H | 0.80706200  | -0.87139400 | 6.19849700  |
| H | 3.56905900  | -0.59019100 | 5.61006400  |
| H | 5.20879000  | -1.06749400 | 3.83327900  |
| H | 2.19426600  | -2.93960100 | 1.41077700  |
| H | -0.57297500 | -3.11608700 | 1.48134300  |
| H | -3.62802100 | -2.36018000 | 4.40569000  |
| H | -1.95452200 | -1.44729600 | 5.99836900  |
| H | -6.57840900 | -2.73882100 | -3.91186800 |
| H | -7.98907200 | -4.71483800 | -4.37971800 |
| H | -8.07989100 | -6.60605800 | -2.78133500 |
| H | -6.74881100 | -6.53553100 | -0.68145000 |
| H | -5.27424600 | -5.97146200 | 1.35844100  |
| H | -3.65604300 | -5.06141500 | 3.01228200  |
| H | -3.04525600 | -1.58173200 | 0.57023300  |
| H | -7.61100400 | -2.13203900 | -0.84911700 |
| H | -8.80921500 | -0.10053100 | -0.08935000 |



|   |              |             |             |
|---|--------------|-------------|-------------|
| H | -5.18716500  | 2.17416200  | -0.49837800 |
| H | -4.01319400  | 0.16568600  | -1.26157800 |
| H | -0.80707200  | -0.87149700 | -6.19850400 |
| H | -3.56908200  | -0.59032900 | -5.61012200 |
| H | -5.20881700  | -1.06754500 | -3.83331700 |
| H | -2.19431500  | -2.93960500 | -1.41075200 |
| H | 0.57292000   | -3.11614600 | -1.48132000 |
| H | 3.62798400   | -2.36032800 | -4.40567200 |
| H | 1.95449600   | -1.44748100 | -5.99838400 |
| H | 6.57837300   | -2.73882100 | 3.91188600  |
| H | 7.98898200   | -4.71486100 | 4.37979600  |
| H | 8.07974400   | -6.60613600 | 2.78147500  |
| H | 6.74866100   | -6.53564000 | 0.68159100  |
| H | 5.27411000   | -5.97159900 | -1.35831300 |
| H | 3.65593200   | -5.06156200 | -3.01218300 |
| H | 3.04524900   | -1.58177700 | -0.57025500 |
| H | 7.61094400   | -2.13215900 | 0.84899600  |
| H | 8.80918500   | -0.10068200 | 0.08919300  |
| H | 5.18723300   | 2.17412900  | 0.49843500  |
| H | 4.01323300   | 0.16568400  | 1.26167000  |
| H | -9.22205500  | 12.72344300 | 3.03425400  |
| H | -10.48788300 | 11.81131900 | 2.19627100  |
| H | -10.07097300 | 11.41195100 | 3.86843000  |
| H | -7.77266800  | 10.67880500 | 3.11357500  |
| H | -8.18651100  | 11.07542200 | 1.45348600  |
| H | -10.01829400 | 9.35576800  | 1.49904300  |
| H | -9.60421100  | 8.95899600  | 3.15963400  |
| H | -7.30408500  | 8.26099400  | 2.41928200  |
| H | -7.71853200  | 8.65746400  | 0.75849200  |
| H | -9.55055100  | 6.93495500  | 0.80475800  |
| H | -9.13591800  | 6.53860700  | 2.46532900  |
| H | -6.83627900  | 5.84588300  | 1.72603400  |
| H | -7.25177200  | 6.24162700  | 0.06457500  |
| H | -9.08100100  | 4.50554500  | 0.10736400  |
| H | -8.66464100  | 4.10944400  | 1.77144900  |
| H | -6.37428100  | 3.41500000  | 1.04163300  |
| H | -6.79449400  | 3.81434500  | -0.63733700 |
| H | 9.22230200   | 12.72331600 | -3.03427500 |
| H | 10.48814300  | 11.81113800 | -2.19637000 |
| H | 10.07113200  | 11.41180500 | -3.86851100 |
| H | 7.77284200   | 10.67872800 | -3.11354600 |
| H | 8.18678500   | 11.07531100 | -1.45347300 |
| H | 10.01850600  | 9.35559500  | -1.49914700 |
| H | 9.60432300   | 8.95885700  | -3.15972100 |

|   |            |            |             |
|---|------------|------------|-------------|
| H | 7.30421200 | 8.26092500 | -2.41925800 |
| H | 7.71875900 | 8.65736000 | -0.75848500 |
| H | 9.55071600 | 6.93478900 | -0.80486700 |
| H | 9.13598400 | 6.53847600 | -2.46542200 |
| H | 6.83635900 | 5.84582100 | -1.72601600 |
| H | 7.25195100 | 6.24153100 | -0.06457400 |
| H | 9.08111900 | 4.50538700 | -0.10747900 |
| H | 8.66465900 | 4.10932000 | -1.77154700 |
| H | 6.37431300 | 3.41494600 | -1.04162300 |
| H | 6.79462600 | 3.81425500 | 0.63733100  |

**Anti-isomer/I<sup>-</sup>:**

|   |             |             |             |
|---|-------------|-------------|-------------|
| C | -0.40835900 | -0.68869400 | 3.24961200  |
| C | 0.84294800  | -1.37934000 | 3.55628000  |
| C | 0.74983900  | -1.78408500 | 4.92259300  |
| N | -0.46951500 | -1.39693400 | 5.41626600  |
| C | -1.19149900 | -0.73765600 | 4.43215700  |
| C | -2.47379800 | -0.19663400 | 4.49747500  |
| C | -2.96601100 | 0.42207900  | 3.35539300  |
| C | -2.20537800 | 0.52548600  | 2.17204100  |
| C | -0.92057000 | -0.04130500 | 2.12093500  |
| C | 1.98652500  | -1.69679100 | 2.83200700  |
| C | 3.05114400  | -2.40118100 | 3.44915700  |
| C | 2.92444700  | -2.74301300 | 4.82573100  |
| C | 1.79479000  | -2.45447700 | 5.56597300  |
| C | 7.78459000  | -3.62173600 | 0.44646700  |
| C | 6.65573400  | -3.46385700 | 1.35371800  |
| C | 5.69936100  | -2.61419200 | 0.75819300  |
| C | 6.14594100  | -2.22856600 | -0.66207400 |
| C | 7.52583700  | -2.88895000 | -0.73318200 |
| C | 8.45339800  | -2.86534400 | -1.76293000 |
| C | 9.65299400  | -3.57324800 | -1.60762000 |
| C | 9.91070500  | -4.30334100 | -0.44054000 |
| C | 8.97860500  | -4.33445600 | 0.59601100  |
| C | 6.40312300  | -3.99808800 | 2.62222500  |
| C | 5.22529800  | -3.66314200 | 3.27207600  |
| C | 4.26614300  | -2.77832100 | 2.70614400  |
| C | 4.52788300  | -2.27664200 | 1.40986600  |
| C | 6.15812800  | -0.72091300 | -0.91328500 |
| C | 6.21790800  | -0.23241700 | -2.24140400 |
| C | 6.00477500  | 1.10154400  | -2.53034600 |
| C | 5.70958200  | 2.00958500  | -1.49432300 |
| C | 5.73978500  | 1.55244900  | -0.15656200 |

|   |              |             |             |
|---|--------------|-------------|-------------|
| C | 5.97605400   | 0.20044800  | 0.11018800  |
| C | 2.91007600   | -2.83157700 | -2.52801800 |
| C | 1.56348700   | -2.40877100 | -2.80781700 |
| C | 0.84727000   | -3.54746700 | -3.25724500 |
| N | 1.74627800   | -4.60133900 | -3.34125300 |
| C | 2.99757100   | -4.20158600 | -2.87589000 |
| C | 4.18109800   | -4.91182500 | -2.64631100 |
| C | 5.22871100   | -4.24381600 | -2.00781400 |
| C | 5.12021500   | -2.89906300 | -1.59274700 |
| C | 3.94845500   | -2.18847700 | -1.87974400 |
| C | 0.92955100   | -1.19980300 | -2.61655900 |
| C | -0.47041700  | -1.13330200 | -2.74054700 |
| C | -1.18816500  | -2.28244500 | -3.14900100 |
| C | -0.54198100  | -3.48165700 | -3.44965600 |
| C | -1.68128800  | 3.40364000  | 0.34319500  |
| C | -1.38947600  | 2.40306700  | -0.65972000 |
| C | -2.03185600  | 1.18915900  | -0.30345800 |
| C | -2.79209500  | 1.35189000  | 1.01597400  |
| C | -2.51525100  | 2.82948400  | 1.33157000  |
| C | -2.95263500  | 3.59557200  | 2.40451300  |
| C | -2.55349100  | 4.93251600  | 2.48480700  |
| C | -1.71567400  | 5.49966200  | 1.50852700  |
| C | -1.27224700  | 4.74078900  | 0.43237000  |
| C | -0.63002200  | 2.48786500  | -1.83962500 |
| C | -0.46018800  | 1.34319100  | -2.59593400 |
| C | -1.04016300  | 0.11299500  | -2.20961700 |
| C | -1.89805800  | 0.06387500  | -1.08936600 |
| C | -4.27261700  | 1.05030800  | 0.75929200  |
| C | -5.14391200  | 2.04892500  | 0.29779900  |
| C | -6.46083500  | 1.75729700  | -0.02535700 |
| C | -6.94764700  | 0.44617500  | 0.09497300  |
| C | -6.08647000  | -0.56466700 | 0.54339300  |
| C | -4.76526900  | -0.25360800 | 0.86676100  |
| O | 5.43144800   | 3.26521200  | -1.87238800 |
| C | -2.31403600  | 9.60780500  | -0.93052400 |
| C | -1.00717100  | 9.10094200  | -0.31633000 |
| C | -0.28919800  | 8.07623100  | -1.20054200 |
| C | 0.99380400   | 7.52187100  | -0.57384800 |
| C | 1.73425800   | 6.52875600  | -1.47519900 |
| C | 2.94660200   | 5.88777700  | -0.79370900 |
| C | 3.69240200   | 4.90845100  | -1.70584900 |
| C | 4.81195000   | 4.19715900  | -0.96255900 |
| O | -8.24838000  | 0.26274400  | -0.23857900 |
| C | -16.79136900 | -4.85882200 | -1.58329600 |

|   |              |             |             |
|---|--------------|-------------|-------------|
| C | -15.32085800 | -4.92731600 | -1.16362200 |
| C | -14.61271600 | -3.57086100 | -1.24238300 |
| C | -13.14047900 | -3.62879000 | -0.82396800 |
| C | -12.43437800 | -2.27194400 | -0.90204100 |
| C | -10.96248200 | -2.33200000 | -0.48142100 |
| C | -10.26423800 | -0.97051200 | -0.55980300 |
| C | -8.80723100  | -1.04872800 | -0.13588300 |
| H | -0.79398400  | -1.56543900 | 6.35745900  |
| H | -3.07082600  | -0.25649100 | 5.40230100  |
| H | -3.96921500  | 0.83211500  | 3.37157900  |
| H | -0.32561200  | 0.02730400  | 1.21757100  |
| H | 2.04765900   | -1.39913400 | 1.79244400  |
| H | 3.74388500   | -3.23186700 | 5.33533000  |
| H | 1.72851100   | -2.73149300 | 6.61339800  |
| H | 8.26696300   | -2.30321500 | -2.67231300 |
| H | 10.39383600  | -3.55097000 | -2.40097900 |
| H | 10.84563300  | -4.84609900 | -0.34199600 |
| H | 9.17772400   | -4.90166800 | 1.50046700  |
| H | 7.10904900   | -4.67546500 | 3.09303400  |
| H | 5.04001400   | -4.11244200 | 4.23911600  |
| H | 3.82762000   | -1.60235000 | 0.93097800  |
| H | 6.37368400   | -0.92885900 | -3.05902900 |
| H | 6.01501000   | 1.46868300  | -3.55070800 |
| H | 5.61655000   | 2.24097600  | 0.66857200  |
| H | 5.95661700   | -0.12678000 | 1.14186300  |
| H | 1.50481500   | -5.54658300 | -3.60206700 |
| H | 4.28284300   | -5.95752400 | -2.91942900 |
| H | 6.14089100   | -4.78983600 | -1.79486800 |
| H | 3.81751700   | -1.16640500 | -1.54224100 |
| H | 1.48300300   | -0.34158600 | -2.25175300 |
| H | -2.26770300  | -2.22329700 | -3.24797400 |
| H | -1.10956000  | -4.34278500 | -3.78844400 |
| H | -3.59548800  | 3.17107100  | 3.16792400  |
| H | -2.89516800  | 5.54367800  | 3.31465100  |
| H | -1.41411800  | 6.53828900  | 1.59731300  |
| H | -0.61982600  | 5.17112900  | -0.31854200 |
| H | -0.16052800  | 3.42144200  | -2.13195800 |
| H | 0.17925600   | 1.36454800  | -3.47208900 |
| H | -2.34233000  | -0.88074900 | -0.79122800 |
| H | -4.78789500  | 3.06834700  | 0.19192400  |
| H | -7.13826200  | 2.52956600  | -0.37429400 |
| H | -6.43340100  | -1.58520400 | 0.65010100  |
| H | -4.11481700  | -1.04604200 | 1.22420100  |
| H | -2.80374800  | 10.34248300 | -0.28226500 |

|   |              |             |             |
|---|--------------|-------------|-------------|
| H | -2.13354400  | 10.08601000 | -1.90058400 |
| H | -3.01821000  | 8.78280400  | -1.09418300 |
| H | -1.21417700  | 8.65250600  | 0.66626600  |
| H | -0.33382100  | 9.94745800  | -0.12489600 |
| H | -0.05200000  | 8.53767900  | -2.16972100 |
| H | -0.97733600  | 7.24672900  | -1.42256700 |
| H | 0.75401100   | 7.03360400  | 0.38229600  |
| H | 1.66733000   | 8.35354900  | -0.32417400 |
| H | 2.05025300   | 7.03698200  | -2.39678300 |
| H | 1.04321400   | 5.73279800  | -1.79394400 |
| H | 2.60893100   | 5.35608600  | 0.10711000  |
| H | 3.63244900   | 6.67582100  | -0.45204600 |
| H | 4.09925000   | 5.42802300  | -2.58185200 |
| H | 2.99768900   | 4.14216000  | -2.07125900 |
| H | 4.39449900   | 3.66604200  | -0.10518200 |
| H | 5.58528100   | 4.89223600  | -0.61514200 |
| H | -17.27350700 | -5.84042300 | -1.51800600 |
| H | -17.35237900 | -4.16745600 | -0.94283000 |
| H | -16.89038300 | -4.50565400 | -2.61693500 |
| H | -14.78948200 | -5.64955900 | -1.79926800 |
| H | -15.24823700 | -5.31350000 | -0.13718300 |
| H | -15.14338500 | -2.84699800 | -0.60669900 |
| H | -14.68433300 | -3.18299800 | -2.26910800 |
| H | -12.60969700 | -4.35212600 | -1.46026600 |
| H | -13.06932200 | -4.01697800 | 0.20266900  |
| H | -12.96360800 | -1.54812100 | -0.26596800 |
| H | -12.50269100 | -1.88320100 | -1.92813100 |
| H | -10.43269800 | -3.05483400 | -1.11885800 |
| H | -10.89489200 | -2.72155800 | 0.54476400  |
| H | -10.77889800 | -0.24459500 | 0.08187100  |
| H | -10.31332200 | -0.57856600 | -1.58332900 |
| H | -8.24789400  | -1.74065000 | -0.78184700 |
| H | -8.72007200  | -1.40738500 | 0.89973000  |
| I | 2.38625900   | 1.37584200  | 0.08060700  |

**Syn-isomer/I:**

|   |             |             |            |
|---|-------------|-------------|------------|
| C | 1.30935300  | -2.52510400 | 3.34450700 |
| C | -0.12767900 | -2.70186500 | 3.43396700 |
| C | -0.50698500 | -2.31198900 | 4.75484000 |
| N | 0.61428200  | -1.86685300 | 5.40994600 |
| C | 1.72085900  | -1.95100400 | 4.57078200 |
| C | 3.03149200  | -1.51895500 | 4.77027000 |
| C | 3.93243200  | -1.71661200 | 3.72947300 |

|   |             |             |             |
|---|-------------|-------------|-------------|
| C | 3.57875500  | -2.38971300 | 2.53987800  |
| C | 2.25119200  | -2.78693400 | 2.34955200  |
| C | -1.10924000 | -3.04921400 | 2.52045300  |
| C | -2.45563200 | -3.09155200 | 2.93454700  |
| C | -2.78795600 | -2.81879000 | 4.28905000  |
| C | -1.83455100 | -2.39916600 | 5.20049000  |
| C | -6.41696600 | -4.07648100 | -1.01265600 |
| C | -5.51155700 | -3.95013500 | 0.10959500  |
| C | -4.55106600 | -2.94528000 | -0.17641400 |
| C | -4.92640000 | -2.21800100 | -1.47873000 |
| C | -6.08441800 | -3.10053600 | -1.98255800 |
| C | -6.82507500 | -3.02659200 | -3.15676300 |
| C | -7.88072500 | -3.92169300 | -3.35587200 |
| C | -8.20642600 | -4.88735800 | -2.39122000 |
| C | -7.47704200 | -4.97039800 | -1.21101100 |
| C | -5.50352800 | -4.62755600 | 1.33648100  |
| C | -4.52742900 | -4.30908900 | 2.26517400  |
| C | -3.51493400 | -3.36657600 | 1.96227700  |
| C | -3.53816100 | -2.67842900 | 0.72742200  |
| C | -5.41532400 | -0.81729800 | -1.04654100 |
| C | -6.75093700 | -0.57930400 | -0.69075000 |
| C | -7.15364800 | 0.66482000  | -0.22704600 |
| C | -6.22228700 | 1.70667800  | -0.09140200 |
| C | -4.88057400 | 1.47671400  | -0.43086700 |
| C | -4.49186300 | 0.22443700  | -0.90212200 |
| C | -1.58348200 | -2.39531100 | -3.35628700 |
| C | -0.16138300 | -2.65887100 | -3.44614200 |
| C | 0.24540100  | -2.27192000 | -4.75437200 |
| N | -0.84564500 | -1.75384200 | -5.41066600 |
| C | -1.95508000 | -1.77915200 | -4.57595400 |
| C | -3.23191300 | -1.24682800 | -4.76464300 |
| C | -4.13560400 | -1.37897400 | -3.71915300 |
| C | -3.82789200 | -2.08575000 | -2.53343700 |
| C | -2.53551400 | -2.58813700 | -2.35545800 |
| C | 0.79621900  | -3.05914400 | -2.52668800 |
| C | 2.14927000  | -3.16627100 | -2.93678700 |
| C | 2.49888400  | -2.89862800 | -4.28529200 |
| C | 1.56978300  | -2.42032000 | -5.19422700 |
| C | 5.99190600  | -4.58604700 | 0.99271500  |
| C | 5.11446900  | -4.34864800 | -0.13357900 |
| C | 4.24485000  | -3.26960400 | 0.17439000  |
| C | 4.67257900  | -2.61181700 | 1.49554900  |
| C | 5.73053300  | -3.61472800 | 1.98928700  |
| C | 6.44611700  | -3.64764900 | 3.18008000  |

|   |             |             |             |
|---|-------------|-------------|-------------|
| C | 7.41323500  | -4.64039300 | 3.36685500  |
| C | 7.67380100  | -5.59754900 | 2.37392900  |
| C | 6.96498400  | -5.57676300 | 1.17850100  |
| C | 5.05589400  | -4.98587200 | -1.38123400 |
| C | 4.11836200  | -4.55554700 | -2.30458900 |
| C | 3.18581900  | -3.53943500 | -1.97605400 |
| C | 3.26737800  | -2.88796400 | -0.72469800 |
| C | 5.30446700  | -1.25925100 | 1.09521900  |
| C | 6.66891100  | -1.13679200 | 0.79476600  |
| C | 7.19581900  | 0.06964000  | 0.35607700  |
| C | 6.36372600  | 1.18825300  | 0.18975300  |
| C | 4.99439100  | 1.07463400  | 0.47598200  |
| C | 4.48102100  | -0.14017600 | 0.92342300  |
| O | -6.71145600 | 2.88384300  | 0.36661100  |
| C | -6.39809300 | 12.48991300 | 3.30564200  |
| C | -5.59842300 | 11.29522100 | 2.77981500  |
| C | -6.46145700 | 10.04873000 | 2.55839000  |
| C | -5.67056000 | 8.84743600  | 2.03180800  |
| C | -6.53499400 | 7.60261900  | 1.81078700  |
| C | -5.74246400 | 6.40244300  | 1.28314100  |
| C | -6.61508100 | 5.16229200  | 1.06430100  |
| C | -5.81317300 | 3.98323900  | 0.53968100  |
| O | 6.96934500  | 2.31892900  | -0.24415700 |
| C | 7.57023200  | 11.87023700 | -3.31519800 |
| C | 6.65543900  | 10.75595500 | -2.80063200 |
| C | 7.40288900  | 9.44654600  | -2.52796100 |
| C | 6.49588900  | 8.32465200  | -2.01352300 |
| C | 7.24461800  | 7.01636800  | -1.74245600 |
| C | 6.33538800  | 5.89484400  | -1.23015000 |
| C | 7.09216300  | 4.58957800  | -0.96374600 |
| C | 6.17421100  | 3.48834300  | -0.46078800 |
| H | 0.62813000  | -1.49840500 | 6.35016600  |
| H | 3.33677500  | -1.02125800 | 5.68536200  |
| H | 4.93550300  | -1.31939800 | 3.82889900  |
| H | 1.94943200  | -3.28016600 | 1.43464800  |
| H | -0.85399600 | -3.28348900 | 1.49415600  |
| H | -3.82971500 | -2.86222700 | 4.58921200  |
| H | -2.11027000 | -2.12378900 | 6.21350300  |
| H | -6.60441300 | -2.29137000 | -3.91969800 |
| H | -8.46038000 | -3.86454400 | -4.27214400 |
| H | -9.03012200 | -5.57116200 | -2.57058900 |
| H | -7.71835200 | -5.71823800 | -0.46170900 |
| H | -6.25194200 | -5.38189200 | 1.55846600  |
| H | -4.49875200 | -4.82102200 | 3.22197200  |

|   |             |             |             |
|---|-------------|-------------|-------------|
| H | -2.79538700 | -1.90914300 | 0.53612900  |
| H | -7.48658800 | -1.37137200 | -0.78013900 |
| H | -8.18762300 | 0.85795800  | 0.03875800  |
| H | -4.13766400 | 2.25925700  | -0.33751500 |
| H | -3.44848200 | 0.06698500  | -1.15858900 |
| H | -0.83223900 | -1.36927700 | -6.34444000 |
| H | -3.50183600 | -0.71728100 | -5.67289500 |
| H | -5.10208300 | -0.89809000 | -3.80612900 |
| H | -2.26703900 | -3.10675600 | -1.44418000 |
| H | 0.52167300  | -3.33458100 | -1.51597500 |
| H | 3.53796200  | -2.99045900 | -4.58295200 |
| H | 1.86469700  | -2.14444400 | -6.20181100 |
| H | 6.27033100  | -2.92218000 | 3.96416000  |
| H | 7.97434900  | -4.66812400 | 4.29595300  |
| H | 8.42926600  | -6.35800600 | 2.54468100  |
| H | 7.15381100  | -6.31929000 | 0.40911400  |
| H | 5.73461400  | -5.79811800 | -1.62201800 |
| H | 4.04754400  | -5.03968000 | -3.27350000 |
| H | 2.59929900  | -2.05802300 | -0.51788200 |
| H | 7.32952300  | -1.98964200 | 0.90685900  |
| H | 8.25221700  | 0.17330400  | 0.13178400  |
| H | 4.32605100  | 1.91860000  | 0.35786400  |
| H | 3.41834900  | -0.20819000 | 1.13586200  |
| H | -5.75845400 | 13.36677800 | 3.45490200  |
| H | -7.19312300 | 12.77145100 | 2.60452500  |
| H | -6.87273800 | 12.25477800 | 4.26605900  |
| H | -4.78984800 | 11.05417200 | 3.48422800  |
| H | -5.10803600 | 11.56738600 | 1.83460100  |
| H | -7.27108000 | 10.28851100 | 1.85362800  |
| H | -6.95295700 | 9.77496600  | 3.50352300  |
| H | -4.86106400 | 8.60750000  | 2.73678400  |
| H | -5.17948200 | 9.12142400  | 1.08657400  |
| H | -7.34407000 | 7.84088200  | 1.10562800  |
| H | -7.02542200 | 7.32642700  | 2.75522600  |
| H | -4.93352800 | 6.16349900  | 1.98876300  |
| H | -5.25251900 | 6.67893500  | 0.33828800  |
| H | -7.41867400 | 5.38684900  | 0.35193000  |
| H | -7.09871400 | 4.86968800  | 2.00464900  |
| H | -5.01879700 | 3.70303300  | 1.24573400  |
| H | -5.34046600 | 4.22788000  | -0.42199600 |
| H | 7.01165100  | 12.79404300 | -3.50195700 |
| H | 8.36045900  | 12.09825700 | -2.58962600 |
| H | 8.05756400  | 11.57859700 | -4.25351600 |
| H | 5.85515800  | 10.56961900 | -3.53065700 |



|   |            |             |             |
|---|------------|-------------|-------------|
| H | 6.15612700 | 11.08544600 | -1.87862900 |
| H | 8.20366400 | 9.63120900  | -1.79698500 |
| H | 7.90368800 | 9.11583200  | -3.44971200 |
| H | 5.69503200 | 8.14034300  | -2.74462500 |
| H | 5.99578000 | 8.65513300  | -1.09138100 |
| H | 8.04390400 | 7.19833500  | -1.00989300 |
| H | 7.74512700 | 6.68490100  | -2.66353900 |
| H | 5.53569000 | 5.71343700  | -1.96291200 |
| H | 5.83606400 | 6.22564200  | -0.30795600 |
| H | 7.88326500 | 4.75596800  | -0.22204300 |
| H | 7.58593300 | 4.24528000  | -1.88103400 |
| H | 5.38679300 | 3.26746500  | -1.19496200 |
| H | 5.68753000 | 3.78235900  | 0.47980400  |
| I | 0.05615000 | -0.54910100 | -0.10404700 |

## 12. References

- [1] Frisch, M. J., et al. (2016). Gaussian 16 Rev. A.03. Wallingford, CT.
- [2] S. F. Boys, F. Bernardi, *Mol. Phys.* 1970, **19**, 553–566.
- [3] X. B. Yang, B. X. Yang, J. F. Ge, Y. J. Xu, Q. F. Xu, J. Liang and J. M. Lu, *J Org Lett*, 2011, **13**, 2710-2713.
